# Supplementary material
Source: PubMed Central journal article supplement (PMC3670090)
Supplement: NIHMS468356-supplement-Supp_Fig_S1.pdf [file NIHMS468356-supplement-Supp_Fig_S1.pdf]

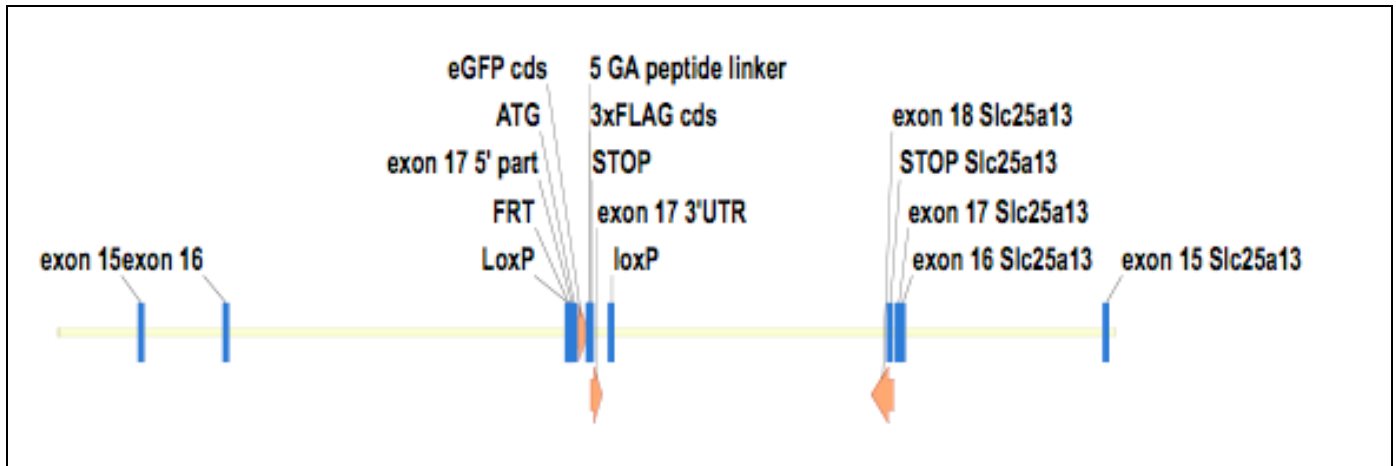

***Dync1i1* Knock-in locus**

| FEATURES     | Location/Qualifiers                                                    |
|--------------|------------------------------------------------------------------------|
| exon         | 4021..4161<br>/vntifkey="61"<br>/label=exon\15<br>/note="gene Dync1i1" |
| exon         | 8206..8331<br>/vntifkey="61"<br>/label=exon\16<br>/note="gene Dync1i1" |
| exon         | 26161..26723<br>/vntifkey="61"<br>/label=exon\17\3'UTR                 |
| CDS          | 25348..26064<br>/vntifkey="4"<br>/label=eGFP\cds                       |
| misc_feature | 25348..25350<br>/vntifkey="21"<br>/label=ATG                           |
| CDS          | 26065..26094<br>/vntifkey="4"<br>/label=5\GA\peptide\linker            |
| CDS          | 26095..26160<br>/vntifkey="4"<br>/label=3xFLAG\cds                     |
| misc_feature | 26161..26163<br>/vntifkey="21"<br>/label=STOP                          |
| exon         | 25240..25347<br>/vntifkey="61"<br>/label=exon\17\5'\part               |
| J_segment    | 27153..27186<br>/vntifkey="16"<br>/label=loxP                          |
| J_segment    | complement(25085..25118)<br>/vntifkey="16"<br>/label=FRT               |
| J_segment    | complement(25051..25084)<br>/vntifkey="16"<br>/label=LoxP              |
| exon         | complement(51507..51645)                                               |

```

        /vntifkey="61"
        /label=exon\15_Slc25a13
        /note="gene Slc25a13"
    exon    complement(41483..41641)
            /vntifkey="61"
            /label=exon\16_Slc25a13
            /note="gene Slc25a13"
    exon    complement(41301..41391)
            /vntifkey="61"
            /label=exon\17_Slc25a13
            /note="gene Slc25a13"
    exon    complement(39961..41074)
            /vntifkey="61"
            /label=exon\18_Slc25a13
            /note="gene Slc25a13"
    misc_feature complement(40888..40890)
            /vntifkey="21"
            /label=STOP_Slc25a13
            /note="STOP of Slc25a13 gene"

```

BASE COUNT      15302 a          10956 c          10603 g          15131 t

ORIGIN

```

    1 ctctgcctgc ttgctcattt tattccactt tccaaggtac cgccatctgc tcttctggct
   61 aaaggacagt ccccatctctg ttcctagcat gttagagaat tttcttttcc tcccaccaaa
  121 tgctaatagac tcctcgggaag tgtgggtgat gccctcaaaa tcattaataa ctgggttagg
  181 gaagaaaaaac agtcattaat aatttttaac tgtttgtaca aatcatttag tgtgtgctta
  241 gtaaatattg gttgaattga aggagagtgt aaagaataag ggtcgatgga tttgtcattc
  301 tctctgtaaa gactgaagac cagattgaag gaccctaaag tgccctgcaa cacagaatgt
  361 gcctaatagct agaaaccctg agtccaaaag ctacctccac ccctccctgt ggctttatga
  421 gttactaacc tccctaagct ataattttct tttcagtaaa caccatctac cttacagaaa
  481 ttttatgctg attaagtcag acaatgtgtg tacagaaccc ggtccacagc aaactttcgt
  541 tcctgccctt cacataagtc ggtactggcc gaccgctctg ctttgtttga aagtcagcga
  601 attaaaagca agcgggactg tgtagcttca cgcacataat cggaaaggca gacctggagg
  661 cccgatgaag cctcgggccc aggctttctt acagtgggtg gccacacatg cacagggtgt
  721 gagtgatgac attttccttt tccttttctt gacatggtgc tgatgctaag catggcattt
  781 gaaaggaaaa catacagggtg aagggggcgt tgtccagtga aatttgactg ctttgcagaa
  841 cgctttccac agcaatatcc tttggagcaa tatttagtta actgaatgac ctcgggtatt
  901 ttcctagagt gaatgtttta aatcatgatg cttctatggc tttgatatac agagaggata
  961 ttgtgaaatt ctcctcaaaa agcattgaca gtgtttgttc ccatactgtc ttttgaaaac
 1021 ctgtgggtatt ctaaaatcaa tagccatact ataacaaatt tgtgggccct gaagtttctg
 1081 ttgcacaaac tccaaagcaa tgttcttgag attgaagaat atcaagggtc ttttgaaaaa
 1141 tgттаатatt tcatgatatt agtatttacc atacattttt aaaaaacatt aagcatttga
 1201 ggaagatcct taataatgtg atacttgag acaaaataaa atagaatgat aaaaattgtg
 1261 tattgaacaa agtgtaattg ttactcaaaa tagtacgggt gttcaagtga catttgcctg
 1321 cactgggtatt ttatgcctct atgggacatg gcatctatcg gtctgtagat agaagcccag
 1381 agcatacagt aatgagttct gtaagtttct caacctatca acttatcaag gttaaacaga
 1441 gcccttgaaa tgtaacacct ctccctgttc ccaagcacac gcctactatg gacaagtgtt
 1501 gctttcaggg tgacctttgt gatagaaggt tcagccttgg ggggtggggag gtgctgatga
 1561 ggagggtttca gaaagacaaa cgagaaagag catttctatc aatctgggtg aaaggaaaaa
 1621 aactgagaag aagagcagtt atttccagat gtttcaaaaag tgggtgtctcc aggatatagt
 1681 ataattttta ccgaatttat cagtaaagaa aatttcaaag gaaaaaaaag gaagactatc
 1741 atagaatgag caggatagtt tttaaaggga ttagtatgtc ttgtgttgac agctccttgg
 1801 agaagggttg tttgaagctg gatggggttt taattgatca aaacaataat ggcattgtgtg
 1861 ttgtgtgttt gttgtatgat tgcattgtgt cccatatacct cagctctgtg cgcttagatg
 1921 aactattgac tgagtgagaa agaatacaaa gaatcacctc tttaaatcac acgtctttag
 1981 ctgttaatga ctaaaagaaa tatgttgcatt tctctatttag tggccagtta ggtataaaat
 2041 caagagtctg tgggtgacatt ctttttttaa caaagagtca gattgtaata tacacgatgg

```

2101 tcagt gagaa acaccagcta tttcgtactt tcttttggat aaataaggca aatgataca  
2161 atcatgctat caggtaataa tttgatactt ggattgtcta aaaaagtatg aattatctaa  
2221 tataaacaat gagaagaagg cataagcagt agctgataaa caaataatth tggtttctag  
2281 tcatatgaca gaaatgagat ttaaacaatg tttatctaga aattacagaa taataatatt  
2341 acatcactat aaaacaaatg tttagtttgt tccttcttgg tgtttcaatg gtgggtatth  
2401 ttttcaaatt atatttcctc agaaatactt ttgaagttaa aatatgacg catctatctc  
2461 tttaaaaaac atcacacaca aactcacaca cactcaaaca caaatacaca cacacacaca  
2521 cacactagtt tatctacaat ctgtgctgcc ctaatctatc taaactttgt ttgcatcaaa  
2581 ccagttactt ttacgctca aggaaatgca aataatggaa gttacagtca ctccccctaac  
2641 acgtcgggtc attcggtttc agtttaagaa ctgtgggttt gactgattc tcgcccctct  
2701 aatctcagcc catgtactgt gggcatctcg cattcacaag cagcacacat tggcagttct  
2761 cgctgataac ttggagcggg ttcctacag atgagttctt tgaatatcca aggcagaaag  
2821 gatttgattg ttacattgta tttatcttct tcttgatctt aaggccctgg cctgtgtaga  
2881 cattccacag agcctgagaa gagagtgcag acagctgact ggaggaagaa gacaaaaatt  
2941 cccattgttt agatttctgt cagaggatat aagaatagtt aatttcttth atctctaggg  
3001 ctttcattat catttaaatt tcattttaca ttaattgatc agggattagt aaagccatta  
3061 tgcagaaatt agaataagac aagccagatg gaatgaataa ttcataaagt ccaattacgt  
3121 tttatttctg gtgtactttc aaacttgctc ctgacttctg tgctatthtg atgtgacaat  
3181 attcgtcggg aatcaagtgt gccattthaa tttattatat cctctgggag tggaggcatt  
3241 tgtatgcagt ggaaaaatgc tctgtgtttc cctcagaac atcaactgta ggggtcttgg  
3301 aaatccttgg tgatttagaa aggaagtcat atthtctgtg taagttcaga ggttctagaa  
3361 tgagccacat tgctccactt ggttctggcg aactaacccc atacagggag gctaaggtct  
3421 tgagtggaga gatttccact tttctgtaag agcgaacc cgcatthaaa ggtatthgtc  
3481 tccttccctc gccgcacaaa aagagthaaa atatgaattt ggccctgcagt tggactggaa  
3541 gaagccatcg ttgctgcagc gacaagggag gtccacgagg tggcagacgt tgccttcggt  
3601 gcagagccag ggtcggccagg gaccgcccgg gcttcggagc atgccagcag gtccaagccc  
3661 ctacagcccac tgctgggttc aggctcccgc gacctgcagt cacagcttgg cctggcaaga  
3721 attccgagct aatggcagtc gcgtccacct gtctggaatg tcgcttacia ctgtgtctga  
3781 aaccgcccctg ctccgcccgt cccggccccg gccattcaa agtacacccc acccccgggg  
3841 atthatttat gccactggac agttgtagtc acathaaagc tccggttca cttctcgagg  
3901 actthcatct cgggaagttt tatgacactt ggtgaatgtg caaagthttt aattaggtc  
3961 tctagacagc ccgagcggc ggcagcga ctaagtctc acggtctctc tgctthacag  
4021 cacaacaagc cgctctactc ctttgaagac aatgcagact atgtgtacga tgtcatgtgg  
4081 tccccgtgc atcccgcgt ctttgcctgc gtggacggga tggggcgtt ggacctctgg  
4141 aacctcaaca gtgacaccga ggtgagcagc aggcgcccgg gccagggat gggaaaggg  
4201 gaccggttc actctgcagt ctggtccttc gtggggggg gggagcctt ttgtggacag  
4261 accctacaat tgccctctggg tacagctcat tgccccact ctcaacccc aattcttgac  
4321 tcccagaag ggaaccaaca gatgcattgg ccaaactcc atgtcactc atccctaaac  
4381 tgtaccagat cttagacagt taacgactct gcccacaca catctthtcc cccaacagca  
4441 caaagtgtgt tcacacttht ccctaagggg aaggacacat cgtgttgaa taactthatt  
4501 ggcagagact tggaaaagta agctthtgtg ggtgctgtt ttagactgga ttattgaaat  
4561 gaggttactc tgtcaacgct ggctatthgt acaatthctg thtgcactc attgaagatg  
4621 gttctctaca ctgctthctg tttagttcta ccatccattt gatttattgc tatggaaata  
4681 thccttgtct acaatattga actcaaaggc catagtgtct aagthtatac atgtatgcaa  
4741 aactcaattc gtctthaaaa tgggatttht acgtgtcaca thtaagtc ttcacaagat  
4801 aaaataggca tctatthaaa aaaaaacag ttgataacaa aatgaatatt thtgaggatg  
4861 tcatctgctt tgttctctt cthtcaatcc ctcaaagta tcgagggcct aactcagggc  
4921 cttgggaatg atgtgttgc cagggaccgt gttacatgac tathttatgt cctaaaatgg  
4981 cctctgcac atthcttggg tthtggthc ggtacaaata cccaggtaaa gattccatgg  
5041 gacaaggat atatatatgt caagthaaagc aggcctthtg aagthcttgg cgcaggaagc  
5101 cattcagcct ttgtaatth ggatcctaa gctggaggac atgaaggaga agcacagaag  
5161 gctaggactt thtgtgggag gggacagggg aathtctth ggggtgtgt gtgtctgggt  
5221 acctataagt gcacagttac ctgtgactat caccagacaa atgtgttht atcgcggcca  
5281 thtttcttht tacctcaaag aactatggga aaagaaagt acgthaatgaa ctatgtthga  
5341 aatgatcag aaggcacgag tgagatgcc atcactgaga tgtthtatagc atcactgcat  
5401 thaaagatth gatgctatth ccttacctt taatgttht ccaaagtct tcatcactgt  
5461 tgattthaaat catattgctt ctatthgcta gaagaaact actcaaagca aaththaaa

5521 aaaaaaaca aaaacaaaaa cctctttcca gattgactcg ggagtgtgct atatcagaaa  
5581 gcaggcctgg ctgggatgct tccatgacac ccggtcccaa agtgtacaaa gggatgtagt  
5641 ggcccacaac ctacttaata acttccacct ctcgatctct ctcctctctc cataaaagga  
5701 aagctatatac ttgacactgg cttttctttc tataggtatc aaagagagaa actcagggaa  
5761 gttttgtgct taacatttaa aaactcatgg ttggtcatac atacagttga gtccaggacc  
5821 tcacagttac aaactttttt ttttttagat ttaagtgaga ttaggaaata gattttttaa  
5881 agacagagag agcctatatt ccccatctgc tttgttgttc ttgaaattat tgtagtttta  
5941 aaccaaattg tcacctccac ccccaccct cggcgaaaat ggctatttac cttgatgca  
6001 agcgactctt actgcttagt aatttatgct atatacatct tgtatttgca attaaaatga  
6061 ctgtgccata aaaacatgag aatacttatg aaatcaaagt tggaagtaag gcacatgcaa  
6121 agagcgtgca gattatttta atacagattt ccgcatttga gttcaaagt ccacaaatta  
6181 ttacagatat attttccttc atgtactcat taatttttag catataaaat atgatagcat  
6241 gttttatatt ttgtataata gctatgaaaa gaaagcattt tggataatct ttcaaaactc  
6301 acttcagtta cattatttac atttcaagta aactaatttt tttagaagca cgttagacat  
6361 tgttttaact acatgagaag gtcagggttt tttaaattaa ttttttagct gtgttcctat  
6421 gaagattaaa cattttactc agctttttaga ttattcaagg ttaaattcta tgtgatgctt  
6481 ttaagtcagt gttaaaaacg aactttgaag ggtctacagc tgaatcatga cttggttttc  
6541 aggccagccc agcgataata aagtgtattg acagaattat agtctatcta aattcacatt  
6601 gtttttattc tttgcaaggt ttggttaaaa attcagactc cagcttgcac agcagggacc  
6661 ttgattgtag aaattgggtt ttgttttttt tttttttttt aaatgagctg gggattttca  
6721 ttttacattt ttgttcacaa ttgacatgca atgatttaag caggtgaaaa gaatttttta  
6781 ttgatttcaa gatgaagttt aaacgtagat tcttacaat gatggagttt ttattgctgt  
6841 tttaaagata ggaattggct caatagtttc ccataaacag atggtttcga ccctgtgact  
6901 agctgaatgc tggggtgcta tgtggcagag cacaccgtgt ttccatggtg gcgagattcg  
6961 cttactgagc acaggctctc cagaggggca gaagatgctc gcagtggcca tcttccatct  
7021 ttctttccat tttcctttca catgtaccat cttctctttt aaagggtgtg tgctatttct  
7081 gaatcaacac cctcatagaa ggctcaggag ttctaaacaa ttataaactt ccaaccttga  
7141 agacaagagt acacacactg acagaagaca gatcgagaca ctcaaaatcc tccctccaca  
7201 taccacggtt cttgagatag acagacagat aaacagatag acagacagat agaccgactg  
7261 caagttctat ttcagcattt cccagttcac tgaaataatg attactagcc caattatcaa  
7321 tggttgtgga tttccagtgt ttgttaaagg tgccacacac atagccgcat tttaacagga  
7381 tgtctctgta aggacagtga caaccttgta gaccattctc catatcttgg tgttgccaca  
7441 gggagaaaga aagataaaag aataaaaaga gagtttatga ttgattcttc aaattttggt  
7501 tttgtttttt tttaacctgt acacacattt attttaaaat tttatctaca ttgatgtttt  
7561 gttttcacat acatctgtat gaaggtggaa ctgtaactat aggcagttgt gtactgccgt  
7621 gtgggtgctg ggacttgaac ctggtccttt ggaagagcag tcagtgcttt tgactgctga  
7681 gccatctctt tagccccctt aactgtatac ttctgttctt tggatcacc cttttctggt  
7741 aaggtagata attctctaag aattagcaca tgtacgctag tattgttatg aagactcaag  
7801 ttgtttgagc aactgactgt tttcctacc caccattgcc ttttatagat cctcaatctc  
7861 tgtaaaacag caagcatctc cctgtcccc gacatatccc gcatgatctg atggtcaaac  
7921 gttgcattta gctggcatgc ttctatgctg gacatacact tgacaaaatc ctgctgctgg  
7981 ctgccacgac ggtgggaaag tatatccatt tttccctttt tgtttctctt ttctactccc  
8041 taagtcagtg gagcgtatga ttccagaaca atgaatcctg ttcacccttt ctcatgggta  
8101 gaagtggctt tgtgcaactg aaggcagttg tggagtaaaa cacatcactg catattagta  
8161 tagttaaatt catattcatt tttcatgtca taaccctttt ggcaggtgcc aacagcaagt  
8221 gtggccattg aaggagcatc tgccctaaac cgagttcggt gggcacaggg tggcaaggaa  
8281 gttgcggtag gggactcaga aggcgcatt tggatctacg atgttgagaga ggtacgtatt  
8341 ttttgttctg ttttgtttg ggacaggagt ttggcttggt tttccacttt aaagacctgc  
8401 tggaaactatt aacaagactt tccgagccac gagaacgctc tctattgctg ttgcaagttt  
8461 ccgttgactt cagtgtgagt ttggagacac ctcttgggg tctaatttgg cccgtgtctc  
8521 catgcacagg acactttcgt gaatgatctg gactctttct gtttgtgtgg tagaaacccc  
8581 agcttggcag gcagaagctg acatgggatg ctgctgggtga ctaaagctgg ccaaactcat  
8641 gctaggggtg aacttghtaat gcaccgttca ctccgagaca gtgaaatagt atttagaatc  
8701 ctgattcaaa ctcatactat tgaagtacag tgcttccaac taagacgact gagacgaatc  
8761 aattttatata aacttttgac atttatgaca ttatcatgta ggacctgtgc ctcttttggt  
8821 atgtcttatt atatgacatg taaaattaag atataaagag aatgccatgg catgtatcaa  
8881 cgagaaaata atacatcttt tactccagaa aaattctgca cttgtgtcct atcttctc

8941 tgccattgct gatcaattgt ggtgttttaa tcagttttct tttacttctt gagaaagtat  
9001 ttattttaaaa accttgatth ctagtaaggg taaggattht tgttttgtht tgtttttctc  
9061 ttaaagacaa agaaaataca ggaaaggtaa ctaaagtggt tgtatacggt tacttaggca  
9121 taattttgaat ctacatttgc attctgaaga gaaaacagac caagtttgta tgcatagtgt  
9181 gctaggcctg aaagtgtctt gtgactacct ggtagactag ctgagctgat ctactgagg  
9241 agacgtcttc agtttcacca gtcagcatca tgggactctg agaatcccag ctgggtgctg  
9301 agcagaggag cctctgatgg aacattatat aatgtgctgt tctacagctc attgtgctgc  
9361 cacaagctaa acacggthtt cagatttcag ctgggcatag aaactgaata acttttagaga  
9421 tggggcttht catcctagca tgcaaaatgc taaatacaac acttaaacac ctcttggtg  
9481 tcctgtagtt agactctctt cccctgccct agttattcct gatgccacaa gtttaagatag  
9541 gcaaggtggc agagacgatc aacctggcc tacacgggtg agatccagat ggccaggtgc  
9601 cccaccatth gaagctthtg aaagcgaatg acatttgagc cagaaatatt tattacccat  
9661 gattctctag ccatgthttt tgctgtgaag thtctthtat tttgatgtac thtctcatgg  
9721 thtccacca gataagacta aacaacaaaa ccaatattta ttgttgatct thtctctcaa  
9781 acgtgtgtgt gtgtgtgtgt gtgtgtgtgt gtgtgtgtgt gtgtgtgaga gagagagaga  
9841 gagagagaga gagagagaag agagaacaag ggacaattaa acatggtht thtthtctct  
9901 thtgtgtgtc thtctctct thtctctct cthtctctct thtctctct thtctctct  
9961 thtctctct thtctctct tgataacaac tgtthtttg agggaaaaa taaaggtgaa  
10021 aactgccag aaagagcaga agatagtcga agtattcaat cctthtctg actctcaaat  
10081 gcatactgtc cactaactth thttaggtag tacacattac ttgtthtccc thtthtctta  
10141 gctagcgtaa caatctggtt tatctcataa aagcctctg aaagacctct atgcttatag  
10201 aatattaca taggtataga gacacagctc ggctaagaaa agaaccagcc tatcatggac  
10261 atcattthct gcaataaggt acattgatag thtgtgcca cagtgactgg gatatgatgc  
10321 tacctggaga gtatatthga thttgcaaaa gttgctthgg ctggcatgta tagctgctca  
10381 acatctthct aggacactat catcatctct aaactgtgaa ggtggcagt gctcatgtgt  
10441 ctgctatcac tgcaggctag gctgthttt atthttgtat tactgccct gctthtctaa  
10501 gtgatattac aggctacaga aatgtctgta gctagaggcc agtctcgcct attgtctgga  
10561 gtctagacag gctatagaaa aatctctgtg acatataata ggcaacaaa thtthtaggt  
10621 tgtthtctct tacaathtca ccatgaggag aggaaaggg agaataatac atthtactga  
10681 gcataggtaa tgttacaatc tctagctct cctgaaatga gtgaaagcca agcttcaaca  
10741 thtgaacaat thtctctata thtthtctct atgcaaaaag cagtggtht thtagactta  
10801 acaatgtcat gttagagtaac tatcatttht cccctaaagt gthtctgtaa agtatcttaa  
10861 thtatttht aggtgaggag agtctthtct gthtctctct gctgactgct gtagctthtct  
10921 ttaaaccctth gaagaccaca attgtcaagg caccagtac tgacaggaag gacaaagtct  
10981 tacagthtga gcttactga agctaaactc thtagagatg tagatacacc ctgggcagct  
11041 gctgccgtha ctgtaathct tatcacatcc thtaccagcc tggaaactgac agcgtatctc  
11101 tgaacthaga atggaggat gcaactccaa cagcacctc ccaatgcgcc thtactgcag  
11161 aaagccacct ggggtgctt acaagacaag ctggcctgtt gggaaataga ggtcaaatct  
11221 aaggtgatg agaggaagag attctgagca ggaagcaatt taaatagtaa gaaatatagt  
11281 gggagaagaa acatgtatgg cattgaccac caathtgtc gtaggctgcg ctaccacgac  
11341 cagcattcag catcagctct ctggtccca thtagagthga atthctcacc aggtcatgc  
11401 tggcctthtg aaagcctgga gagaaaaaga tacaacact thtagataac thttaaaca  
11461 tagtctgtgt accaatgaaa aggtagtht ccagaatcct cagtgtgat ctgctgctc  
11521 tgagatccca gtaaaactgaa gaggtgtcgg thtgtgaaaa gccctctcac acctgthtt  
11581 thcgttgctg ttggccaag acctctgtga gactggagga agaaggcagc tgcctcttht  
11641 tgccatgatc tctthtctct ggtgaagcca gctacactgg gactgggtg ggtthcacag  
11701 ggtcctggc thtcaaggctc tgagctagcc cagtgttht thtctattgt thtctattg  
11761 ataaacagth gttacaaga ggctccatat thtatttht taatgggcc tgaatattag  
11821 gtggcctgth ctgthcttaa gaaaattgat gtaaaacaa ataagaaata aatatttht  
11881 gcctggacct ggatcattg gaaaaacaaa gagaaatct tagaaatgt gctcaataga  
11941 gtgcgtacaa catcagctct thtactct thtactct aagaccataa gcctcagatg  
12001 gtgcattcgt gtagtgctta agccaaggta ggtctcag acacctccc ccaacctatg  
12061 thccatccca thcataatht agatatact thtctthtga aagthtctta thtthtctg  
12121 thcattagat gaagcagggt gggacagact gctactgth thtctgccat gtaactthc  
12181 atcaaacct thtgagacat thtctthtct gthcaggtaa gaaggccact gcacagagg  
12241 actctggtgt caccagtht aacaatcgt tgctthtct acctcagct aggtgcagct  
12301 gctgctggga gthccagctc agagcccaa agatagtht cgtctctatt acgtacaath

12361 atccttagga tgatcgaggt ggctcagatc cagacactga cgcaacttat tagggacctg  
12421 tgaagaggta aacagagggt tgtgtaggag ctactgaga tcaacaagtt gactttgtct  
12481 acccagcccc catcttcctt actttttgct acatttaa at ggcaaaagtg tgagtaatct  
12541 ctcaaggcct gtaactcggg aagtaaaaac ataaagcagg catattttta agcaggctac  
12601 ttgatgctgt gtttgatag cacacactct tgcttgtttg atttcagcat tgtgtctgga  
12661 aatctattgt gcatatttat tttcacagat aggggcctat ttccttcaca gaacagggtg  
12721 ttaacttcca ttagtataaa tagaagctac acaaatccag tataagacaa agagcccccc  
12781 ctttcactat ttggttgtaa tttttattct atttgtgctt tcaaaaatca cttaaaaaga  
12841 aagtggttac atgcatcatt taaaatTTTT gaaatctaaa atcaagggct gaagagccag  
12901 ccccgagtt aaggatgctt gctgctcttc cagaggacc aagttcaggg ctgagcaccg  
12961 gcatcagact tttcacaact tcatggaact cttaggagatc tgacaccctc cggggcctct  
13021 tagagcaact gcacacacgc acgcgcacac acacggacac acacacagac agacagacac  
13081 acaccagag acacacagac acacacacct ctaaataaaa gaaaaataga tccattttta  
13141 aaaatgagcc tagcctttga caaccttttg agaaatgtct acaagatgca tgacgctcgc  
13201 actgtgggggt ctcatcaat taattagaac atgagagaaa taacaagcca caaattaagc  
13261 ctaactataa cctcagatgg atttagatca gaatacattc acagaagaac tctgttgaga  
13321 actgctggtg tttgtgtgtt tggtgtttgt ttgcttcaag tgatgtgtga atgcacatac  
13381 ctcaaagact taaaactaga aattacttag ctaccgtgtt ctttttctga caagcaagct  
13441 gtttctgcat gtatacacia cgggtttctc actgcgcatg cgccttgtgt cttagaggtat  
13501 tgccgagtc tcgtgattga tagtcagcct atctacctgt ctttcttggga gatgtgtttt  
13561 atggaaagcc cgttgtcatt gttaaagctt cactgcagtc acacggacgc ggctgtcata  
13621 aatatcccct aacgactacg ttggttgctt atctgaatta gtcaggacgc tgtgcaagc  
13681 tctgcttctc aaagaagcag attatcttcc acctcctatt atttctttt ccattaacct  
13741 cttccagggg agatttcggt tgcagttctg ataaatacct gcagctttca gatccctgat  
13801 tacatTTTTT tacactgtac acgtgacaaa atttcaaaac cgttttcagc ttaaaggagg  
13861 atttgcaaaa taaaattatt acctagaaac cgtgacttat gaggacggta aatattaaca  
13921 cactgactgt gtttgtctga cccactgagc aattagtaag tagaaatatg catatgtctt  
13981 taaattgaaa ctcttaactt tgggaacaca aataactcat ttggtattac cactcacgag  
14041 ccagaatgac agcagttata tcaactacaat tcaatgaatg cagtacattt gtcaacatat  
14101 aaatgcattg aatagttctt gggatggaaa acacaggtga acatggtaca acaaatgtta  
14161 tagctaaaaa ataaaaata aaaataaaat gtgattttta attaagtatc tgtttgaaga  
14221 tttttaaaat ggaagtaaaa aagtagattc aaaagtttaa tcagaatcca aaaagaaaaa  
14281 tgaccatgac tataaacttt aaaacagtga ccaagatggt acttgtaaga actattaaaa  
14341 aaaatacctc tagggcgtgg gatataactc agtggctaag agcttagaca gaaacaaaac  
14401 aaaacaaaaa tattgttttt caacttttgc gcagccagca agaataggaa taaacagaaa  
14461 tttccaggag tcatttctcc tccagtttgt cctaaatagc attcagtaga gaaaaatctg  
14521 ggaatgctag aagtcggagg gggcctgagt ggcacaaaat caacaaagca tatttataga  
14581 ttttttctc cagtggatta tacgaagcag taattgtttg ctcttcacag tttccagcag  
14641 gacagggat acattattct caaagcagc ctgggtcttt gtatgaataa ctgctctcct  
14701 tgggaattgg gtgacagaa tgacaagtag aaagttaa ac tgaagcctgg gtattaagtc  
14761 aaacaagagt tccctcgcga ccaactgtg taggaaggta gccgtgcggt tgctctcgc  
14821 ctcaagctca gaacataggt gacagctcag cttagcagt tccaggagc agggccgggc  
14881 tagtgtcact tagcaacatc tggttgtgac catccaaggc gctgggtgtt ctattaaga  
14941 aagtgtgcct gcaacttgct agagtctcga cggccatgg caaggactgc tttctttgat  
15001 ggagaaacia ttttagattc tccagctgat gctgtacaat tctttgggtt tccccttctc  
15061 agtgagagag ttgaagacag ggactgttcc ttccatggta ccaagcggcc agataaaagc  
15121 tgacaatcta aacccaaagc tctgtctatg gtgtctatgc atttgataac gcaaacactg  
15181 gatttgtggt tgtgcttttt agatttctca cacattctta gggtagagac caggcattga  
15241 actcaaagta cacaaaatca tatttgtatg ggaatgggtg atagtaataa acatcattgt  
15301 aggaaaacag ccaatctgaa ttagtatatt aactcacttt tcagtcatag taagttacat  
15361 gcatttaaaa tgattggagt aaaataatgt ataattataa ttttagtgtt aacttgattt  
15421 ctctgtgca aagtgcataa tttttaaag aaaggaaaag gcactatgaa ttccaataaa  
15481 attacttatt ttatagtaag tatggtagca gccgcttcca tttgataagt atatgtgtaa  
15541 aagaccgtga tcataattag attaattact atataaattg tgtgcttatt gaggtagcat  
15601 ttggtttatg aaaatgggtt tacagtatta aaatcttttc aagtgcattt tttttccaaa  
15661 attgatacaa agtacttaca actttcatat tttgtgagtg gttgactaag tggaaagccc  
15721 taatgttaag tttatgtaaa ccatggtaaa atgtgtctag tgcttttcaa cggcctatga

15781 atatatacct cctgaaaccg atggcagctt gacattctcc gtcttcagga tctgtctgcc  
15841 atttctcagt tgtctttggt ggttgtttga atgctgaagc aattgtcatt agacgttaa  
15901 cgttaaacgt tttatgactg acaaattgta tgagttttat aattgtaaag ctttgtgttg  
15961 attgtttttt ggttggttgg ttttgtgttt tgttttgttt tgatttgttt ttggcgtctt  
16021 gaggtaaagt tttcttgttt agctcatctg tcctggatct tgctctgtag accagactgg  
16081 ctgcaaacctc acagaaatcc acctgcctct gtttccctat gctgggatta aaggcgtgtg  
16141 tcatcgtctga caccaaaact gttaaatfff gtctcaaaaa agtgtcaatg agagcagtta  
16201 agtcaaatca catcctgcaa agcccagtat aaaggtctgc cctgccagga agagagactc  
16261 tttggtctgc aaaaaacctg agactttttg gtttggtttg gttttttggt gtgtgtgtgt  
16321 gtccatgtgt gttggcatat ctaaaataaa atatgaaatc aaatatctgc ttctgtgttt  
16381 atatataaat gcatatatac cacatagggt ggacttgaaa atgaggaaga ataaatgacc  
16441 cattatcccc ttgtcaagaa agaattaaac gtgtatttcc tagaatatca gctatcataa  
16501 catcttttac cttggatttt ttttacttga aataaattaa ttatgtatca ttaagtaat  
16561 agccagtctt ctggtattgt agaaaaaac ttgtcccttt tcctagttag caggccaaac  
16621 agatcgggag cccactccta ggctgtcttc tggtgacaag gtagtcattt cccagtattt  
16681 agattaaatc ttttattctt attgaccttg gactaagct ctcttgaata gtaattgaac  
16741 accttctagt atctagtatc ataaagagtc gacttgtcta gcaaatataa cagcaaagta  
16801 gtataacctt tggagaaccg aatctgtaga aacacacca gagataacgt cctcctctgt  
16861 taaggcaggc acagcgtgcc caacacagt tctgtcatat aacaggaatg aatgagtccc  
16921 ggcgtgaagt gtgacgggag agttaagcaa aagcttaatt gtacaatgcg ttcagaatgc  
16981 agcctccaaa ccgagtacag tctggtagcc acaggaagtg tgactgtatg tgcacagaaa  
17041 aggagtttta gaaaagactg tttgtccttc cagtcattac ctggtcttcc tccctccctc  
17101 gcttttagaa gagagagatt gccttggcgg ccaatgcagt gaaaacctag tagttgactc  
17161 aaacacttgt caaccgctag aaaaatgctt ccttttcatt gtggtttttt tttttttttt  
17221 tttgggacac tatagatatg ataaatcatg aactgcatta taaaaatact tcttttatgc  
17281 ccaaacattc cgtaggagga aatgacattt cttttattac cttggtaa at gtttttaagg  
17341 tgttttagcga taagctttct ttttgtcaaa actgcttaga ttccgtgggt gctaggaatt  
17401 tactggaaaa cctatagtca ataacatgcg ggaagaggca gcagcatggt tagtcagcta  
17461 atgtggggag aggcttgtct aggaacctt tctttttgcc ctgcctctct ctgtgtgtct  
17521 tttgtactat ggaaaggag gtgattggag tttaggaagt ttatttctcca tcattgtcca  
17581 tcagccattg tttccagcac tttctgcac tttcgggctg agaaatggat tgttcccagt  
17641 agtagacaaa ataataacat ccaacaatft caggagacag gcagctgata tgatttcaat  
17701 atgtgcacaa gcaagggcat ctctagggtc tgccgaatga ggtctttctt tctcagctgt  
17761 tgtttggttt tggttttctc tgcaggaaaa cacctctgga ttttgggtacc cttgcttaca  
17821 ggataaattt tagcatgaag aataattgta actgttaatt tctcaagaca agtgtttaaa  
17881 ttgcttattt ccttccatag ttactggctt actgccactg ccagaccctg atctgttact  
17941 atttactttg tcttttatgt ctgattttcg tttcttacct tattaggtgg gaaaaaaaaa  
18001 taacgttggt ttgagaaaca tcaccgttt aaagatagag gaaaaagggc tttggcaaac  
18061 aggtccaggt tagaaagcag gtgacctccc tagtaatttt aacctattga ctggctggtg  
18121 atagcaggct acagagcaga tgtgcatgcg tccggctttc ctgacttctc ggaagcttct  
18181 tctaaggcta agtcgtcccg ccacagtcta cctcgtgggt gaaggctgta gtgtgtcttc  
18241 gcctgtgtag ctgctcctg gcacaggatt ctggtccgtg gtttccctcg ttgctaacag  
18301 ggacctagac cttgcctttc tgagaattaa acacagtgaa gctgcgttta tgtgaagcgg  
18361 gtctgcccgg ctgatctaac gtggctgttt cagaacctgc tacatcccac tttgctcca  
18421 tctgtgtgtc aaaaagcaaa aaaacaaaaa acaaaacaaa acaaaaaaac aagacaaaac  
18481 aaaaaacaaa caacaacaaa caacaacaaa acaacaggct ttctctgaac acagatgcat  
18541 gtgtgcatgc cagtggggtt ctgctctcct ggatttgggt gccattaata tctgtgggtg  
18601 ggtttgtttg gttttaacct tttgagtcta gaggagttaa actgtcattc tgagggatg  
18661 tacacaagct tccctcattc tgtaaggcac tagaaacagt gtgcattaaa ataaaaaggt  
18721 ctttgtaca atatcttttt agcagaaaac tttcctgctg gtgtaatat tgaatatgac  
18781 atcgttctcg tgtctgttca ctatcggcgg ttcatgttat agccccacag acttttttta  
18841 aatgactcca cttaattgaa agattacaaa gacactgatg aaccacacat ccacaaaagt  
18901 atttatcttg aacctagaga ccacctcact tagttttttg gccatgatta atggaactga  
18961 gaaactaatt gagattatgg aatatttttt tcaacctctt aattatccaa ggttttccaa  
19021 ccatgcattt gtaaattggt cctgagatat attttatcac aaaaagattc atagctagaa  
19081 gtgaactgca actattta at ggagtataga aatgatcctt gaaacagtct ttactgcagc  
19141 tatttaaaat cagctgctag ggactataaa tccttagaat ttactgaaaa atgagggaga

19201 cttgacggag gactgttcag agctgttagt tgtgtgctta taaaaagagg cacatgaatg  
19261 atacctgtgt gtttaacccc gattataaat aatcacttga tttttattac aatgtgttca  
19321 acaataatcc agccttataa cctgtgggta aagtagaatc ctgctgcaga aatgctgta  
19381 acaaaaaaaaa aaaaaaaaaa agaaaagaaa agaaaagaaa aagaaaaagc tgcattgaga  
19441 tgcattggtc ccatgtggaa aaataataga ggtgtggaga atatttgcac atacgtacac  
19501 acacatatat atctagaagt aatataatata tattttaaatt taattttaat ggataatata  
19561 aagcaactat gacaaacttc tcttacaatc aaaaaaaaaa aatctctttc tttagttatc  
19621 ccagtaaagt tagctatttt ttttttaaaa caaactatth aggtagtcac gtgtaaatatt  
19681 cagagaaata aaaagtgcct caagataaag taaaaaaatg cagttctaga gaggtaggaa  
19741 gaagaaaaaac aggagagata gaagaggaaa agaagcaagg aaacgaaggg aataaacatg  
19801 gagaaagaaa aattagaaga aggggggtaaa catggagaaa gaaaaattag aagaaggggg  
19861 ataaacatgg agaaagaaaa aaaataagag acatcattta acagggatta taaggggcca  
19921 agcactgtgt tcatttgttt ctttcttact catgttacta ccagtcatta ggtgtactct  
19981 caaatttcct tcagctaaat aaggagatc agagaggttc ctaaggacac acagcaaaaa  
20041 gtgacaagct gggaggggaa aacaaaacaa aacaaaacaa aacaaaacaa aacatcattt  
20101 ggctactttc tgtggtggat gaaagccagt tctggcttta tctccagttc tagctactct  
20161 cctgtctgtg cctcttaciaa ggtacccaag atgccagggt gggacacact atggtcagac  
20221 tcaccagtca gtgaggctac aggcagctgt tgaccactt agagagcggc tcagctcccc  
20281 tgaccagca acacaggtcg ggtggacaga aggaatatgg gagaagttaa aatcatccac  
20341 gtatgtgatt ttttttctt cctacaagtt tctgtccttt gctctttgct tgtgacctt  
20401 tgtcccctaa gaattttgga ttacagtctt tggaaatctt tagcgggtaa ctcaaacgc  
20461 attacctgcc ggccattcta ctgtggagg ctggcccttt tagagtgtga ggtgttacct  
20521 gccccacacg gacttgtgaa actgacttgg gaagactgtt tagctgcctt tatttccctt  
20581 ttccttgtgg gtaaagatgg gtttcttaat gttctataa cagtcagagt tcattctttt  
20641 aggaaaaaat ggtcctcaga agcatactga agaacagggtg taagctacct gtcgtgtttt  
20701 aggacctct tcatcagag tgacagctta cagtgtgaat accgtatgaa ggactcagtc  
20761 tctcttcaact cagattacct ttctgtctt cgccagggt ctggtgataa atggtcgat  
20821 gccccatcc ccatttgaca atcgaggcaa tgagaggata aagcctggct cttgccggca  
20881 actgaaataa gagtaagact cgattgtcct gaccagtat gaggtttatt tccccctctt  
20941 tcttaacgcc aaattgctac ctcaataact acctttggcc ttcaatcctc tggctgttaa  
21001 tacagggca ttccagatct ataaaagggt ggtgcttctc gagctgagag tttattatct  
21061 tagaaatcag agccctcggg gcttaaggca ttcaaatgct ttaaacactt tacccttccc  
21121 cagattagc agcagttctc aggcagggtg gaccagctat gggtagctc tgctctgaga  
21181 agcagtgga aataggagtc ttccatgacc tacagtgtga ctccggccga ccaatctgca  
21241 gcagaaaatg cttccagatc caagtgggcc caacggaagg tctcgaaagt ctggcattgc  
21301 ctttatttca ctatgctgtg ttttctcctt attgcctctc atggatattt caatggatca  
21361 ggattatcat caccatgaga aatgcaata ctttccgat cataatctat ttatttatgt  
21421 ggagaccagg ttttactatg tagcccagga tgtcctggaa ctcaactatgt aaaccaggct  
21481 gcccaccaa tcagagatct gtctgcctct gcctcccaag ggctggggtt aaaggcatga  
21541 gccacctcac catgcaacaa gtggaaatga tttaggaatt attggaaaca gttctttgca  
21601 aggggcagg gtgtagtctt caatggtgct taggtgctct gcatttttag ctttctgtgc  
21661 cttgatagaa actgaagaga ggctgaagca atgcctcagc tacctgcttg acagggagac  
21721 atcacttaca gtaagaacac acttctccat gctattcagt ttctgaatct acgccagtat  
21781 gcactcattt tggccaaagc cagcattcat tttcacctcc acttcccggg catcacattt  
21841 caaaagggtt gtcaagggtc tctggttcta acacagggcc tggcaccctc gctcaatcac  
21901 tcgctcgtg tgcatgctga ttaggtgctg gtaggaaca aagccttttc ctaaccagtg  
21961 agtaaggagt ggttagaaac gcccagcac ttctctcaac tccttgctct gctgagaac  
22021 accatgaaag agactgggaa cttcccagg taagaaggac agctcagtc aaacagattt  
22081 tgttttagat cataagaaac agacaagagt ggccatcccc tttgtgaagc acctggttg  
22141 tctcacctac aagtcattca gatgccaaca gtggtgactt cagcagtgga aatgacctgt  
22201 gaatacacat tcgcacattt gggctaagat tacacttaga gtgtttcctg atgtgatgtt  
22261 tcattctaaa aatggagcag tgtgctgtgt ggcttctaca gcgaacagtg cattcagggtt  
22321 gggttatttt tatagccaac tgggtgaaaa ggtgcaacgt atgtgctagg aaaatgaact  
22381 tcaagattcg agaagtaatt gtgtttttat catttctgtt ccagaatttg atgtagacaa  
22441 agcaaaactaa tatttctgta atgcacatgt acttcaggaa ggaacacact tgagggaatg  
22501 aaatttttaa aaaaaaaagc ttaatattgt tgtatatttg tgtgaatgtg tggcgtgatt  
22561 tttacacaaa atattattag cttattagca agaagaatat tacaacatgc cttaggcata



22621 atctgcatat ttaa atgcct gtgaagacaa accttcatat ggaaaatcat gtttttagcgt  
22681 ttaagtattt tacattgggt tcagttccat gaaagagaat agtttaactg ctagaataac  
22741 tgcatagttt aactgctaga acaattttgt ttagtagaaa catttaggtt tgagaaaatt  
22801 tagtttttat acaatagaga tgtggtttaa tataacatgc atggttgcca gtttcaacct  
22861 gtgtctggcc actatttgaa cttgatgatc cagaatctaa acagagggtca cttcttaagc  
22921 atcttgctaa gattactaca tttcctgttc tgatgcatga atcctataca gtgctatcaa  
22981 taaaatgtta tgcaggccat cagatgttaa ttttttcct gcatgaagaa atagtatagt  
23041 cttatgtgtg tgtggggggg ggggtcctca tctgtctgta agcagatgct gctgggttgg  
23101 ctcagttttt tcttcaagtt taacgtcata tagagggtgag aggtgcttta gctttgtaac  
23161 tctccagctt ttattttctg agagaaaaag tcatgctctc ttgattgagt tcctatctct  
23221 cctccagctt tcgttacata gttctttttg caaacattag ctctggtacc aggagaagga  
23281 aaggaaacat ggacctgttc tttacttaa atgatcccaa ccctcttgcc tgtttatgct  
23341 gttgggttagc tttttgagt ctttttagttt ggggggtctca tttccccagg gaagtattat  
23401 cttta atgga agacaaaaat gaagactagt gaaatccgag agaagatctc accataagga  
23461 aactggctctg agctaagggt aatgatgtca ctcgggtatta ttgtgaatgt gtgtcattga  
23521 tgcaagagaa atttagattc atttcaataa ctaggggagt gtccttattt cactagttca  
23581 taaagtactc atatgtctga atgaaactct cactggagaa gcatttctga taatgaactg  
23641 aatgctttcc cacctggaca tcagtttcag aattatattt tttgaaacgt ttgaccttag  
23701 tactagaagt cacttaagag catactttac agaacggcac tgccactctc cagtcagttt  
23761 tcttgacag atagtatcgg agactatcat ttctctaat aaacccttaa aggttctaat  
23821 catctggctg tgtatagtga gaaattttct agttatagtc ataatttgaa cacttacttt  
23881 cttcttctc tctctctccc tctctctctc tctctctctc tctctctctc tctttacttt  
23941 taataatgta tattgatgga attgattgtg ttcttaatgt cttaatgtat atgggacata  
24001 tggatatcat gtgtgggata ccatgtgtgg tcctagtatg tagatggatt ggtcatacca  
24061 ttttacaggg tgaacaaga aaattcttgt aatatagaaa tcaatttcat tgcctatgcg  
24121 ctcttcagc attctactca gtgctgttca tcttcagatt ttttttttg tatttcaaac  
24181 aataataatt ctttttgta tctttaaaca actcatttg gatgctatgt agtgcaatca  
24241 taatctttat tgcagctaag aaaaatttta tgcaaatgt ctacacaagg gtatgttaat  
24301 tcctcttcat tgaatggcag acagcaaaag acaccatttg ggaagtatca tggaaactccc  
24361 cttttggcaa atcaatatag cttatcaatt caatgctgaa attgcataac actggcagag  
24421 gtacttgctg gttttgtagt cctggtagga ttttacttcc ccatgcctca acccctacat  
24481 cctgcttctc gttctataaa atggaataa tttgcttgca tacatagggt aaatttacca  
24541 cacctaagac tgctctgaga tatgagttaa tatatgtaaa gtacttagaa tagaaccttt  
24601 ggtcagtgct agttagtcct gcagttactc atagccatca acacagacc tgctggaaat  
24661 gctcgaccgt gaccttctat aggaaaggct ctgtgcatat gtaagctatt ttttctccat  
24721 gtgtattgac tattaatgg ctctttagga acaaatcga taacttcgac tagaaagaaa  
24781 gtgccgtagt cattctgaaa tcatggttaa taatgcagcc tttatttgct gagttcaccg  
24841 taggacccaa gaacaaagag cgctccttac tatgagtgtc ttaatgtggc ctctgggatt  
24901 gtttagttaa cacacatttt aaaggtttta tgcattccct gagtgatec cctgctgagg  
24961 agtgaagctg taggttaagc tccagacttc aggtccccc taattctcac agtatttggg  
25021 tttctaggat ttaa atggtt aaacaagctt ataacttct atagcataca ttatacgaag  
25081 ttatgaagtt cctatacttt ctagagaata ggaacttcaa gcttggtggg tccgcggac  
25141 ctttgcatc tttggtgagg aacggctgtt ccgataacaa ggagtgtaag atacaagaga  
25201 ttatcttgct tatcatttct ctggtgattt gccttgca **gtgcccgttcc acacaatgat**  
25261 gaatggacac gatttgcccg gaccctgggt gagatccgcg ccaacagggc tgacagcgag  
25321 gaggaagggg ctggtgagtt agctgccatg gtgagcaagg gcgaggagt gttcaccggg  
25381 gtggtgccca tcttggtcga gctggacggc gacgtaaacy gccacaagtt cagcgtgtcc  
25441 ggcgagggcg agggcgatgc cacctacggc aagctgacct tgaagttcat ctgcaccacc  
25501 ggcaagctgc ccgtgccctg gccaccctc gtgaccacc tgacctacgg cgtgcagtgc  
25561 ttcagccgct accccgacca catgaagcag cagacttct tcaagtccgc catgcccga  
25621 ggctacgtcc aggagcgcac catcttcttc aaggacgac gcaactaaa gaccgcgccc  
25681 gaggtgaagt tcgagggcga caccctgggt aaccgcatcg agctgaagg catcgaactc  
25741 aaggaggacg gcaacatcct ggggcacaag ctggagtaca actacaacag ccacaacgct  
25801 tatatcatgg ccgacaagca gaagaacggc atcaaggtga acttcaagat ccgccacaac  
25861 atcgaggacg gcagcgtgca gctcgccgac cactaccagc agaacacccc catcggcgac  
25921 ggccccgtgc tgctgcccga caaccactac ctgagcacc agtccgccct gagcaaagac  
25981 cccaacgaga agcgcgatca catggtcctg ctggagtctg tgaccgccgc cgggatcact

26041 ctcggcacatg acgagctgta caagggagct ggagcaggag ctggagcagg agctgactac  
26101 aaagaccatg acgggtgatta taaagatcat gacatcgact acaaggatga cgatgacaag  
26161 tagacatgag atgagctctgc cactctggc gccaccctt ccatgctaga actcagtctg  
26221 cagtcaaggc ccccggtcag tgtttggcgt tctttctgta tcagtatccc cgtggcatct  
26281 tgggtgccat attgtgcagt gtttccccat attctccacg tgtacctact cactcgaaat  
26341 ccaccccagc gtttctacct ttgtgtcccc gtctcaaaaa caaatggggg agggaaccct  
26401 taggggttta gttgttgccct tttactact tggtagctgt atttaatagc tggaaacctc  
26461 tggttgaatt tgtgcttaca tgtacttctg gcgtagtcct attaaatcca tatgaagcca  
26521 gatatgattg ggtgcagatg tgggtgtgcct catgatattg tacagggcca aagacttgag  
26581 atgtgggtgt ttacatgggtg attcgcatta tgaatggatt tactacaaga acattgctgc  
26641 tccttattta ttgtaatgtg ctgcatggaa catatattatt tgaaagcatt aaaataaacg  
26701 atcttagagc atgtgcgtaa tgagaggact ctattttctc tgctgctgct gaggttacat  
26761 taagttccaa ataacaatta cagtatgcca gttccactga gaacacggag tctttagagg  
26821 tttgttgacg tgaacggaat gaattttaat gcctattatt tctatgcact ttaacaatat  
26881 ttcaaatata gttgaccatt gatacttgtc gtccaagcta gcacagccct gcaaaagtct  
26941 gcggttccta aatatgacac aagtattact aagaaaatgt tccaactagg cttgtatcac  
27001 tgtggggaaa tgttttgctt agcagaaaac ctgacatgaa gtttgctttg acaagggatt  
27061 agagagattc gtgaagacca tgttaaagac tgaacacggc tttttaaagg gccgacacgg  
27121 tgggcttaac tggtagccgac tcagtcgata tcataacttc gtatagcata cattatacga  
27181 agttatttaa gtcaagacgc cgagatgtat ctgtataagg cttcatatgt gtatttgttg  
27241 ttttgttttt actggtggtt gatttttagc agtaggcaact tttttgccct tttcaccaa  
27301 gcctccaagt ttaaaaacaa acagtcaaat ggtagaacaa ggagggacag gttgaaataa  
27361 acaaacacag tttgttctac aaatgggtgt ttttaaattc aactacaaa atgctgtaat  
27421 cacgatgaaa ttaaagattg cctataggca gctttaatcg tgcttctccg gggttatctt  
27481 attgctaaag agagtaaaaa taaattatgg ttaaataatt aaaaaactca cttatcaata  
27541 ggcctttgat attttaggaa gaaaacttcc atccatacat tcttggtgtaag ggatccttga  
27601 actaatatag ttaaaaaaat atttttaagg tatatatttt cctccaactg ctctatagta  
27661 cctacataat taaattccct tacaacaga aattaacatt tcgtagataa aaatgaatgt  
27721 cttcatgtat gtgtatttaa actcagtggg tagaagtatg aagaaaaaca tttgaaattg  
27781 tcagcagatt ttctgtttta ttaaaggaga aagtctaatt tagcaatata ggggtcactc  
27841 tttagatggt atgaaaatat gtcagtgtat ttctgcaaag gtaagccaaa ataccattac  
27901 gacaatatga tgaggcacia gacaaaaaag aaaatgtatc cacaaacaat gctaaaatct  
27961 ggtgacctga gatctctcag gactcataca gtagacagaa atgactccca caagttgtct  
28021 tctgacctcc acgtgtcaca cacacacaca cacaagcaca ttcacacgca cacacacaag  
28081 cacacacaca cacacacaca caagcacaca cacacaagca cattcacaca cacatgcata  
28141 caaacaataa aatgtaaaca ttttaaattc taaaagcaat ctagtaaaaa aattggacaa  
28201 aaggctctca ggcataggct gaatcatcat taagagtaa ctaaaagtct gggttgtgat  
28261 tgaagaccag tctctgaatg ttgccatggg cgaagcctgt gaaaggcaac agatcagagg  
28321 cacactgagg agcacacttg atgagacatg gtaaagtcct tattgatccc ctgagacagc  
28381 cagcctcca atcatcctca gactcctcgt tgagtgggta tcaacctcat gtgattaca  
28441 gaataagggg acattatgag gagaataata ttcaagggtg atttttgctc cacctctgtg  
28501 agattctggt gtaatctaaa gtgctagcct gggcatgatg gtatacaacc ttaatcctag  
28561 cattcaggag acagaaacag gcagatctct ttgagtttga ggacagactg gtctacatag  
28621 tgagggtccag gccagggcaa taaaagaga tcctgtctca aaacaacag tcaacaacac  
28681 aaacaacaa aaacaataa ccaacaacaa acaaacagac aaaaatcgaa acaaaaaaac  
28741 caaccacagc taatagctgc ctctctgat acatgataat tagctatttg gctgagcaat  
28801 aactgtccct gaaactgtaa attcgatagc cacttaatcc aagaagccaa atctctcagc  
28861 agtccccacc taagcactga tagcgtggaa ctcccagag tcaactggtaa tgagttccat  
28921 taggagcca aagaaggag agtcttatgt ccatggctga tctcagcaga atgctcactg  
28981 cttttccctc agacctctt ctagctagaa ttcttttgg aagacacttc ctactttgag  
29041 agtaggtctt tcttctctag ttgacctct cagggagcac cattatagtc actccgggtg  
29101 atgtgtcccc tgggtaattt taaatctcat tgagtatcaa cagattctca tatgtgccac  
29161 tagtaatatg aagctaagag atgaattcaa agaagattta gggacctgt acttcagtga  
29221 gcctgctgat atttcctcca acataaagga aaaactgctg atatttaaaa ctctcatcct  
29281 gtagaagaaa acccagcatg tgctaggtta tttggggctt caaagccaac acattctatg  
29341 tctgtagtcc acatgctagg tggaggcaa ggcttttgg gaacaaaaaa tggggaatgg  
29401 gctttgctat aggtctcagt gcaatgagca ctaagcttag gcaatacagc cacagaagtt

29461 aatgatgcaa acattaatga tgaggagaga cagtgtgata ctgttggaat accatgcatc  
29521 atcagcacca ggtcctgtag aaaaggattc ccttgcccta ggataagaac atgccatgca  
29581 tttcgatggt ctactgtagg ttaagccata ttggcccccac tgaaccatag ttagaaagag  
29641 ctagaggcca tttgcaatat agaaattgtg atcggaatca aagagagctt gagtaacttg  
29701 cacaagcaag tagcccagga gccagtgctc actcaacaga atttcaccag tgcctctacc  
29761 ccatgcttgt acacatgggc atgggtgggg gtagggaaat ttctgtatga ccagcagaaa  
29821 ggacagaaaa aacaccagtg cttggtgtaa atataggctg gctcagttca tgggagaaa  
29881 ttagacatgg atgacagcca catgttaaag ccgtcttctg gactttgaaa gacagtatat  
29941 agaaaaaaat cttttcatag atcagagatt tgggctgtac aacctgccat ccacaaacat  
30001 aaacctatgg gggcaattcc acattcaagc cactttgagt gagctgagaa agggccagga  
30061 gttcacgtgc ctatggccag cctacttcta gctctgtttc tgcagtagct accaccctt  
30121 acctttcagt ctgtctcttc agaatagcta caagagctgt gttgctcaaa cacagaagtc  
30181 accagaatgc acagcaggaa ggtccaaatc cttatcatgg tctgtattcc tagattatth  
30241 gactttgacc tcaagtgttt gttacattht tccttgttgt gatgaaacac ttgaacaaag  
30301 caacccgagg acaggtht at tttagctcct ggttgaagag acacagtctc tccccatgag  
30361 ggggaaggth gtagaagtgt gaggtgactg cttcacatgg tctaaagtca ggacgcaaag  
30421 agtgggtcta gctatccaaa ctcatggcca gcttcaatac ctaccaccgc cagagcctct  
30481 cctgctcctg aagthtctac aaccttccaa aacagcacca gcagctgggt accaagtgtt  
30541 tgaacacatg acctctggg ggaacatctc acaactgaac caggctcctct atggtcttat  
30601 ccctgagtga cttttacgac cccactcaag ttgcaagggt ctgctcattt ttacacacia  
30661 ccagtcactg agcctctgaa gcaactgtht agaacattga cttttcatgc acacatcctg  
30721 aagatccacc ctttcattaa ggtcattctt ctgactgact gatttttcaa ttaacttht  
30781 aatctgtgag agccgtatgc tccttgaggc ctaaggthca tatcaatgtg aaaagctaca  
30841 gcctggaaga gcaataatag caaaaataat aaaatgcacc tgctattcct catcagtgac  
30901 agaattaaaa taagaaaaga atgatcttht tctthttaca gthtagtgga taaaatgtat  
30961 aatatcaag aatttgattg ttgacttht aaactthaaag atgattaaaa tactthtct  
31021 tgtgagtacg agcatttggc tgcatatatg tgtatgcacc atgtgcatat ctggtgccta  
31081 tagagggcag aagagaccta gaactggagg ctcacagact gthgtgaacc acaattggg  
31141 tgctgtgagc ctaaggtagg tcctctgcaa aagcagcaga tgctcagaac caccagthca  
31201 cctctccaga ataacactct cctcctcaga accaccagth cagthcacctc tccagaacia  
31261 cactgtcctc ctccagaacca cccagthcagth cacctctcca gaacaacact ctctcctca  
31321 gaaccacca gthcagthcacc tctccagaac aacactgtcc tctcagaac caccagthca  
31381 gthcacctctc tagaaciaa cctctcctcct cagaaccacc cagthcagthca cctctccaga  
31441 acaacactgt cctcctcaga accaccagth cagthcacctc tccagaacia cactgtcctc  
31501 ctccagaacca cccagthcagth cacctctcca gaacaacact ctctcctca gaaccacca  
31561 gthcagthcacc tctccagaac aacactctcc tctcagaac caccagthca ctccactctc  
31621 cagaaciaa cctctcctcct cagaaccacc aagthcagthca cctctccaga acaacactgt  
31681 cctcctcaga accaccagth cagthcacctc tccagaacia cactgtcctc ctccagaacca  
31741 cccagthcagth cacctctcca gaacaacact ctctcctca gaaccacca gthcagthcatc  
31801 tctccagagc aacactctcc tcctcatagth tthtttgaag ataggtctc tctatgthac  
31861 cctggcttct cagacactca ctatgcaaaa caggthaac tccacattth acctctccag  
31921 cattcatctg cctcttaatt gctgggatta atgctthgact thattcaaca actthtggg  
31981 gtgggggagg tggggctcga gaccagattt ctctgtatag ccctggctgt cctggcactc  
32041 actctgtaga ctaggctggc ctccgaactca gaaatccgcc tgctctgcc tcccaagthc  
32101 tgggattaaa ggtgtgtgcc accaccgcc ggattcaac aactthtaac agthtattht  
32161 gcaatgthta agaggccaag ccgtggtht gaactgtgtht acctthtcat thgtactthac  
32221 gthactthgaa gthgtthacta gatacatagth thatttctct tggthaaactg acctgtthcat  
32281 ctgacatagth aggactgagc thcagthcctt gtgcaaggca agcacagagc aggacacacc  
32341 thaaccttht cactthtata thagthactt ggtthcgtgt thgtthcattt cagthgaagg  
32401 actcactgth ctgthtthgcta cthtthgcttht cctctatggg atthgcccagth thcatcttht  
32461 ctctgaggaa thththththt thcatcaaaa atgthacttht caaggagaga thththththt  
32521 thtccagaact thgaaatctc cagacaaggc thcagagatg gcacaattca thgagthgctt  
32581 actgcacaag thgtgagthta thaatthgaa tccccagagc thcatgtgag ctgggcaggg  
32641 thgtgtgthaa thcatagthc thcctaaggth agataggag cagagacaga agaacctgg  
32701 thagctcac aggtcagata acctggcata gagaataaca aacagaaaa agcaagthg  
32761 thcagthgacc thgcaaccact thccacataag cacatgthata cagagthttht gagggtgag  
32821 ggctgtagg thgagthctc agcccactgc cthtctcccac thcagthtct cthtcttht

32881 tacattgctt acaattggtg tcctattata aataggTTTT gttgctagtt ccacaactat  
32941 gTTTTggggT ctttctatta ttattatTTT ttatttactt tgttgtggct tttttgtcct  
33001 taagattTTT aaatgctgta ttcttttagg tattgctTTT gtgttctgac agttaatgct  
33061 tggagtaggt gaagtctttg tgaggctcac gTTTTggat cattaggaac agtgtatcga  
33121 ctgttatcag cagcctaatt taactgttca cctgacactc ttctgagatg tctacttggT  
33181 gtgctatgta ggctgaggac tttcctgTTg ctctcagggc tgaattttct tctcctcagg  
33241 acctccagaa ttttcattct ttcttggTTT cagtgattct ctccgagtct cccaaaggTT  
33301 cttttcacat atagctggat tagttctTgG cccaaagctg gagccctcag ctaggatggg  
33361 ctcttttTgT ttacagattc tagctaactt ggtctctTTg atctcttcta tctgttcaaa  
33421 cagtcagggg aaactcaggg ggtctctgaa gatctgctac tctgtacctc aagtggaaac  
33481 tgccttaggt gacaacctaa ggcagtgata gtctcacacc ccaaacacag cccctttctt  
33541 tcccgaatac cagctgcttg aagaacctg gattccatag ttctgttaca ttctgggattt  
33601 cccaactgTc ccagaagcag aaaatatttt tttttgtaag atacaacttt taaagtagaa  
33661 aagtaagatg gaaaagctga tcaaatttat gttggggaca ttggtaactc atagttatag  
33721 aattaaaaaa atataataca acactttaca gatgaaaagt ataagatatc agtgaggaca  
33781 tagtgatgcc aaatattacc ataaagcggc cagatatgca tagagaggat taggaaatgt  
33841 aggcattcaa ctaagactct tcctaaatta catgcaagga gaaaaaatg tgagccttaa  
33901 cttcaaaggg gcaaaactga tgtcttctct ggaccacag tcacaggcaa agcaaagaca  
33961 aaggaaaaga agattacaga cttttcaaat ggataaaggg tagcatatag gtttgggTta  
34021 agctcaacct gcttttTgtag taaagaggca cccagtgcc agtagggcag gacagagccc  
34081 caactgaatg agaaagagag gctgggctgc catagcaaca taactggcct cacttctctc  
34141 tgcagaagaa aaaaataaat atccggactc ctgctactga tgccagtggc ttctcttctt  
34201 cctccttctc ctctctgac tttctgattt tatgaaagca gagcatcaac ctgatataac  
34261 aatgagactc tcccaaatga caaactttat cataagaggc agattcttaa aggctggaga  
34321 gacggctcag aggccaggca ctatggctct tgcagaggag atgggTttgC ctctcagcac  
34381 tgacttggtg actggatggT gactgaagac tattacctcc tgttccagga gacctgatgc  
34441 cctcttccag cctctgatgg tacttgaggt atatatgtca cacagacaca aattcaggca  
34501 aataaaataa aacatgtttc aaaagcaacc ttagatgaag caattaacta gtggaagaca  
34561 tacattctca ggatataata gcacacatca aattgtgtag cacttaagtg gcaaattctg  
34621 cttcagaaca gaagtataca gtctgaataa aaacatgaca ttttgatgtt gtttttttcc  
34681 aacaagaaag tgttgcaagt ttttggcatg gttcattaat aacttggTca catttTgtgtg  
34741 agaatgagtg acacagaatg atggTTTTa gatttgaggg gtagtaagaa acctcttgag  
34801 gatatctttc tattagtggT ggtgggactc tcatgagcaa agtcatcaca tcacccccac  
34861 attctggaga ctgtctccag ttctccaga cactgagacc aagtatccat agatatttac  
34921 tttaaacatg gttttccgTt atttccaacc ctTgtctaaa aaatggcatt ttctaattaa  
34981 gagattttga agatgatcca gttctgTttg ctTcatatca cattgcactc ttaacttttt  
35041 gtaaacttac ctctgcTTT tccacattac ctTccaactt tattcccgTg gggcaaatgc  
35101 ttcacgttta cctcaatcct ctttactgac tttaataggc tgtaaaattg tttaaaggga  
35161 acctcaaaag attgcctcag gattcacctg gtcctcaagt cctggagTtc tttgagggag  
35221 caaatgtact tggtaagata aacaatcaga aatcatgctt ccccttctcT caaaggTggg  
35281 tacggTtctc cccatagtga aaattgacca cctggggcac actgtcctaa ggcctctctg  
35341 tactgagTtt tacagagaag ctttctagT ggagggTggg cttttaggaa accagactca  
35401 aacctgagct ctttcaactg ggtgcctaag caataagaca cttattgctg gtctcagTct  
35461 cctcattttt aacacggcaa aaaaggatac ctcttcaagg accaggaaga ctttaataaga  
35521 tcatgtctgg catgtgtcgg ctctgtTta ataagTcatt acaaatccga gaacctatc  
35581 ctttaagagg agtgtgcaag ggaccattgc aagagctaag gccggcagag ctaaagctaa  
35641 gctttaggca gaggaatggg atatgtgctt ttagtgtTgt ttactcttga cttgtttttc  
35701 tctatcttat tgtacaagTc tgttctgaga atttgcatca actttaaaat caccatatta  
35761 actcttccac cttgaaagag tgtcccacca aaacaactgt aggcaccaga gccttggTgg  
35821 ccagaccaga gtaaagggag gcgtgtctat gaccagaag tcagcttgag acaagcacia  
35881 ttgctgcgTc ttcttaattt tcctccaaga gttatccaag gggactgtgg ttttgcctta  
35941 agcaaaacc ctttaacatc ccagcatctc aaagcaaaca acattatttt attaggtacc  
36001 ccagcagatg aaagcaagtg ttccattTgG actcttctca ggcaattaat gcattagcta  
36061 aagacaaacc ttctgaaaa atcaaaccac tgttctcagc agcctccgat ggattTgggg  
36121 aacagagagc aagcttcaaa tgtgtagTca ctgataagag aatgattcc caactcacct  
36181 caagcctaaa gtaacattcc acatgaagga gaagattttt tttaaaaca cagtTtaatt  
36241 tttcacaatg accaggaat ttaaattcat cctTgagctc atgtcattct tcgtggctca

36301 cagaaacaaa ttattaataa ttaaaaccta ttttacagct atgttgattt aatagaagat  
36361 tgacttgtga tttcttttaa aaaaaagtgt ttgatactcg ggactgtatc aattgtcctt  
36421 catttctggg tttaatgcca gcagcagaaa ggcctatca gggacagtgt ggaagtcagt  
36481 ctgatagcac agcctgtgtc ctcagcctga tgtcacaaga ctgtatttcc aggtatttgg  
36541 tcgattgaga ggggtatatt aacagtttca gcgtgtttga gcaacttgta aaggccatga  
36601 ttcaaaatth taaaaagag aaaagggctg gagttacaac tcagtaatat aacattttta  
36661 tccaaggcca gagggtttaa ttatttagta tcataaaaac caccaaaata taagagacat  
36721 ggtggaggaa aaagcattta ttaaaaattc acccattcaa ctgttccttc atgcatacct  
36781 cagaatgata acttcaaagt tccgtggctt agaatggcct ttcccttaca gaaagccctg  
36841 tttaggtttc aaggagagg ctgccactgt tgagaaacac acacacgagg atgttggtag  
36901 gtatccgaga caggaagaag caggcaattc tgtcagtaca ttttgtctta ataccaagg  
36961 ctgaaccttt gggagaaaac tgtgtcccat ctgcctcccc tccccagggt aagacaaaag  
37021 gcacacacgc ctttgtggaa gacgctcgtg gaaagaacat tttagaaagc tctggaaaaa  
37081 tccacatcct gaaagcattt gattaccag aattgaaaat gggatttttag tcagtggcaa  
37141 gagtacaaat tcatgcctac aagtctggct tctgcggtca gaggcacacg aggggttga  
37201 gggaaggtta atttggaagg cagataaact ggagcctaag acagattcaa caaatattat  
37261 cactgaagtg cccccatcct tgcacctgaa gcgtcccgac atgcccgtgca ttctgaatac  
37321 acagtctgag gaggtacaa acagtttcaa gcgcaatttg ttccctcgggt tttattccct  
37381 gcacaccgag ttatgtgccg ctaaacattt ccagaagact gtcaaaacgt aagcgtcccg  
37441 aggtttacac aggccacacc attaaataac atataagcac aaagatttaa acattgtttt  
37501 ccagcaatgc taaatatttt cgctaagtaa aaactgaagc ttgaaatgca ataagcattt  
37561 aaacgactct tttctctggg ccagaattct tacttttccc tgtgcgacct tggtcgtgg  
37621 gattaaggcg accccagggg gctccgcaa tggttgtggg ttatgagggt cagcaggggc  
37681 ttggcgacag cgcgccacc agcttcaaga aaccagcca cgactggaac ccaagaacca  
37741 gtgtgttcac tctgtggtca gcttcgcat ttctcttctc cctggaaaaa aattaaaaag  
37801 gctgctacga aaagcaggcc tgtctcccc gcctccaag caatcactgg ctgagccaag  
37861 cacagagctg cagggtcca gggctctaca cttgggaagg catggaagca cacagggcg  
37921 acatgcctac tgggccttt ccttaaagag ggacaccgtc caggaactta ctgtagcaat  
37981 gacaggagcc acgccgtcc aaacatactg tgctgtcact ctggggagaa gaaaaacca  
38041 gaacaaatth cacgtggtt ttaccgcatg gtgattgcag gccaatctta ggctctcaag  
38101 aggcattgcca cccactgagc agaagtcag gaaattaggc ctccttcaaa ggctctcaag  
38161 tctactgctc ctgagcagaa aaagtcaagg atttcaaga aacagggaca gtgtgatcct  
38221 atctcctact ggctcttggg cctctgctgg cttcttcttc ttctcttcc tctccccctc  
38281 ctcccccttc ttgtttctca tccgttcctt cattcattca ttcatttata tattcacttt  
38341 acatcccagt atgaacctcc ctccttcccc attgtggaat caccctcagt cccaggcaga  
38401 accaagatgt tccccatca aaaccaacag ttcataaagg gatgggtgga ctatgtgctt  
38461 ttgatgagat ctgggccagt gggttttttt ttttttaatc aaaatctgat cttttataaa  
38521 atttccaaca agtgtcaaaa gggagtatga gaactcgggc tccaagccc aaagctggga  
38581 cactgcattt tataccatcc tcaaaactgat acctggtctt cgaggttgct atgtagtaaa  
38641 taccacgttt gtcccatttc tggtaaagat ccacacctt aacaggcgtg cagatcaaaa  
38701 actcgtgggt gatgctgaag atttccagct ttaatttaac tgcagggaca gggatggaaa  
38761 ccttcaggga ctaagaacac tcacaaacc tagtaaatca atcagcatca ctttgggta  
38821 atgagtgctg ttgacagtaa tcacaaactt gtaagatttg cttcttttcc caagtcatca  
38881 caatgaggcg aacactaaca agggttggat acagcgaat ttgcttctgg tatagcccag  
38941 tagtaactta cattacaggt atcatagcac agatcttatg gccacttcc actgtagctt  
39001 tatgttactt tactcatcgt gagaagaac tgtagcaagt tgggctgggg agatggcctt  
39061 gtcaatacgg tgtccactgt gcaagtttgg gccctgagtt tggatccaac actcacatag  
39121 aaatccaggg cagaggcact cacatgttac tcaagaacag gcagtatgct tgggataagg  
39181 cacaggtgga tctctggagc tcattggtca gttaggtcac caaacttaca agctttaatt  
39241 ccactagagc ctctcagtaa ttaaaatggc aagagcaagg aagccatcca gtgctaaagc  
39301 ctggtttcca tacatacatg catacatgtg cactcttacc caagcactta cagataaatc  
39361 tactccccca tgagcacaca tgcttcccaa acacacaaat tgtcttaagt attaaagatg  
39421 tttaggttga gctggagaga tggctcagag tgtaagagc actgactgtt cttccagaag  
39481 tcctgagttc aattcccagc aactacatgg tggtcaciaa ccactctgtac tgtgatttga  
39541 tgccttcttt tgggtggtgg agagatggct cagcagttaa gaacactaac tgttctttca  
39601 gaggtcctga gttcaattct catcacaacc atctgtaatg ggatctgatg ccctctgctg  
39661 atgtgtctga agacagatac agtgtactca tataaataaa ataataaat cttaaaaaac

39721 aacaacaaaa tgatggttcg ggtgagtgta tctgtccagt agttctttct ttactcagag  
39781 tgatgagata tatgttcccc tactcattct gagacaggaa aaggagccca tgcattactc  
39841 cgaaagccag cttcaatggg aacacaatgt ccccaaacat ggcatgaaga gttgtcagag  
39901 tccactaatg acaatatttt tgacatttat catggaaaca cacaagagca agcaatcaat  
39961 agctttaaaa atagttttatt tttcccttca caaacacaca agcctctgac catgatacaa  
40021 ggcaccccaa atcaattata aacttagagc atatctgtct gacatgattc aagagaaagt  
40081 tgatttttaa ggcaaaaggg tgccaacat ggggactcga ggaggggtgt accagcaaaa  
40141 aggggtgtct gttattctta cagtgtctgt taaaattgga atcagcatgt gttcatcata  
40201 tacatattta tttcaaatca gtacaccag gagcagaatt gtgtttcttc tgtctctata  
40261 ataaaacggc ccaagcact tccttagcat tcgagacttt tccctagtag acttgctata  
40321 gcaagagaat atgattgcta aacatcctga atgtggtttt cattatgaaa aaacatgttt  
40381 cacataaac cttcataata taatccagag gccaaatttg tgcattgtaa aaatttgagt  
40441 ccaggctaga tatttggtt ttttttctt tccagtggt tttcattttt ataaatata  
40501 actttgcttt ctactacttt aaacatactc agaagtcttt tggaaacat ggccgccttt  
40561 cagtagcatt agtgagacca tcatccaggt aggagacctc cttaatttcc cttcagactt  
40621 actccacatc aagttagtat tgaccaaate ccagtattta aaagatacaa acacaggttg  
40681 tgggcaaagt gccaaaggat aattaggaat aattccccat gatcttgcta caaaaacatc  
40741 cagaaaaatg aatgattgca ttaatatag gaagcattga cctgaattta aatgggacag  
40801 atgtggaagg gacggagcca ggcctcagac ccagatgagg cttattgtgg ttccaatcat  
40861 tttacaggca catccaggtc agtcaactta ggagtcccca gcagtcactt ttgaggtaga  
40921 tgctgatggc ttaaagagag gtaggtaaag tccaaatttg ttctcaatcc ctgogaatgt  
40981 ggcaacggcc agtttgtagc cccctacgtg gtcaggattg ggagcgggca gagtaatccg  
41041 ggatttagga accggctcag atcccacggg cttcctatga agagaataaa gggagtgtca  
41101 agtgacttta aaaaatacca gtagacacca atacaacat gcaacatgga gcagtgactg  
41161 aattctagtc aatgggtgtc tccctgggaa acgaccttgt ggacgttgtc acaggaggca  
41221 gtcagcccc tgcaactctc aatgagaact gagtattaga ggctgtggac atttagcagt  
41281 gaattcgcca tgcaacttac acgcctccaa aatcgacata gaaccaccgc tgcagcaatt  
41341 catacgtaa caaggtgaca ccaactggg gcgaggagcg gaagacacga gctacgacca  
41401 aggggggaat aacagacacc attagagtct taagaaattt ccctgatacc aaagattagt  
41461 taagaaccaa ttacttccgt accagcaact ctttccaca atgctttggg gccctcttct  
41521 cgaagtatct ttctgaagca gtcggtcaca ccggtgtaag tggtttggcc agcccgggca  
41581 gccacctgta atctagtctt gataacatca gcaggggtca ctaaagatgc cgcaggcata  
41641 cctggagccg agacacgata ccatgtcagt ccactcacat tctcactata taaaaataac  
41701 tgtgctttga actgctggcc gtggaagaa agttaagcag ccagtgcaat aaaatgccta  
41761 ttttgctgtc ctctggagag cacaacgtga cagtactgtc tgcagcgacc aacccccctg  
41821 cccggaacct tcatgtgtt tttctattct taaatacata aatatttcta agcaattatt  
41881 tatccgtaac actatttcaa gtggttgaga acaaacagag aaagtggttt tcaaaaaatt  
41941 ttttattttt tattttattt ttattttttt gctttcctgt tgaaatcaga acctcatgaa  
42001 gttattaggt ctgatttttc agaggcgaag cttattatgt gtttctctt catggtttcc  
42061 tggctgctgg cagccacagg acgctgcttt ccctcacaca tccagctacc ctgcacaaca  
42121 aaacccaac ttctcctacc agaaggctgt actgatcgt aagcaaacac caggagcctg  
42181 tttgtgactc cacacacaca gtccccccc acccccaat cgatacatct agaaaacttt  
42241 aaaacagaaa gcttaaaatt tatactggct ggtaaatgat aaagaacaat aacaacaaca  
42301 aacaacaaa caaatccctc ccaacaagtc cctcccaaaa ttacctacag taaattattt  
42361 ttacagtcgc tttttatcca aaaatggggc agccaagtt gagagtttta aatgggagac  
42421 cattcagaag acactgtctc ttacggtttt attacttttc cactatgaac ctattccaaa  
42481 ccaactgggt cagatgcaga tgcataaatc tcctttgctt tttttaaggc ttaataatc  
42541 tgtaagaatt tctgtccaaa ccaacatggt ctggcttaga actccatctc atccttcaac  
42601 agacagtttt aaagtccat tgcaagtgag tgtgtgtgga gggggagggt gtaactgtga  
42661 actacacgct cccatttcta ctggaagaga agcgagtgtc tcttcgcctt ccatctccac  
42721 tcaactcctc taacactaat tcttaggcat agtcattacc caaacactgc cttttacata  
42781 tgcaaagctc actctctatc cagtgttcat ctaagaagca gcatcgggct cctattagct  
42841 tggagggatt actgtaattt tgagccagga atttatcttc tcacatgacg aaaggaaaca  
42901 cgatgcttag aaaccactg ttcacactgg ccattttgct tcaactcctg gtttaaagag  
42961 aatttagcag ggagtctcct ctagacatga aatgaagtag tccctaaccac gctgcagatg  
43021 cgatcatgtg gtgctgtgaa agacacaggg gtaataacga aggacacatt gttttccac  
43081 gaaggtatgt ttcatacaca attcctggtc atgaataatg ctggaggaga gcatgaagaa

43141 tacatgcaac gagaatacaa atgtctgaat gaaatgctga aaggaaacac ataaactact  
43201 taacaagatg actggcaaag cagattgatg tatgtgtgtg tgttgggggc gtgtgctaga  
43261 aatcctataa ctcaaacaca agcccagcca tctcgtctgt agccccaca ccctcaaatg  
43321 gatgacgtct aggctctcag aactgttaca gacatgttgt gtagacttct gaggggcatg  
43381 tgtagtgggg agggggggtg acactaaact tggaaaactg agttcagcta ctctaaaagt  
43441 tggctagtcc agtcaaatgt tccacaaagg gcttggtcac ctgacagcta ctggttttcc  
43501 aggtccgagt ggacaaagat tatgaatcaa tttgccaggt cattctctgc cttatgccac  
43561 attgatgaaa cagcttgagt gtggaagaag aagagaccag acgataggaa gggattgtct  
43621 atgtgtcctc acaggaagag ggcgggcac cctgcttgatt aattatggac aagactcgtg  
43681 catatgtagc cctgggggct acccatagcc tcagcaacag aatgacatg aggtgctcag  
43741 aggctaataa aaacaactgt gggacttcta gggagccagc gactacagac gatcactgac  
43801 agcaggaaga aaacaaaacc tgactgggtg aatccagaca gctttgggga caaagacatt  
43861 aattttataa gtatcatatt aggattaata actttgtgtt ttctccattt aaggcttaaa  
43921 ggtttgttac atatttattt taggtcaaag ttaaggcttt ccacattaca cttttaagct  
43981 attagctata tgatcaacct actaggttga cgactgacag caatgtgata aagttattta  
44041 ctaagaagga gggaaatcag ccgggcagtg acagtgcact cctataatcc cagcactcag  
44101 gaggtaggca gatctctgag ttcaaggaga gtctggccta caaagtgagt tctagaacat  
44161 ccagggctac accgagaaac cctgtcttaa aaaacaaaaa ggaaaaaaaa aaaaaaaaaa  
44221 aaaaaaaagg agaaaaatct cccgctgcct acccttcctt ctagagctga actgaaagcc  
44281 tcgatcttca ctgcatgcat ttctgctgac tgtggctact ggactctttc ctcatgtcct  
44341 gtgtatgttt ctgtctcctt cacttccagt ttgatctcca tttctccact agataaatac  
44401 acattgccgt gacatagctg tggcatgtat gtatctgcca catgggtgcy actctaatat  
44461 gctcacacc cttttctttc cttcacgcag tcttcttgca cagtaagtat gaacatcagc  
44521 gtcagagaca atgtgtattg attcccagct ttttcagccc aaacttttct ctgttaaagt  
44581 tgcttcaagt atcccatgtg tccttcttac attcactcct gatctggctg ctgagagtgg  
44641 aaccctcgca agcagagcag atgcaggctc tgcctcccc ttggatgcta catcaatgtg  
44701 ggccacacct catgtcctgg gcaagtggga ggtacggtac tgttgcagac tagaagccca  
44761 tcttttacta agtggtttct gtccctttatc ctaattctca catcaaggta atatctttta  
44821 aacagacagt acacctatgt tctatgcccc ttcagttctg attttttcat ctctgtattt  
44881 ttatgccata ttctaggggg taatctttac catgtcttta tttcctaaag gtccttttct  
44941 ctttttctctg attttttact taacacaggt ttgaggcagt cctcaaactc ttaattctct  
45001 tgccttagct ttctgagtgt tgggattagg ggcaagcacc atgaaatatg gcctagcttg  
45061 gttttctttg atcatgtctg ctttatcatt tagaaccata gagattttta atttcaacaa  
45121 tcatttcatt aattaaanaa caaaaaaact actcaaagcc tctttggctc acaaaggtta  
45181 gcctcagtcc tcttaatgag aaactgtctt aagataatca agtaatcatt gcattcgacc  
45241 cttgggtcca tcctcaaata aacacataaa ataaatttaa aatgccacag aactctgaca  
45301 tgtgttacat gtcaattttc tgagttaaac tttgtccgat agttatgaag tatacattcc  
45361 cagaagagtg ggtgaaagat tactatattg tttttacaac ttctgtgga cttactttta  
45421 ttttagaata aaaagtaaga taaaacgaat cccctttcca agcttccaat tacagttctt  
45481 gcaagttccc ctgtggtccc taaattaccg ttttctctgt aatttttcag ttcacatgcc  
45541 ctgctgcccc ttctgtctg agcatggctg gctgtctact gatactcggg atcaataaa  
45601 aggctgtcca tgcaatgcac tcagccctgg gtggcatctg ccacactcca gacaaactc  
45661 cccaccactt ccccttttgg atgggcaagc gctctatcct gaaagggcta aggcaggcta  
45721 cagggtctgag ctttccagaa ttctggcgtg tagaaagcca gctgaactgt gcagtgagaa  
45781 tacttcattt tccactccac tgaggaaaag ctgttaattt atgttttgcc gcacctgtgg  
45841 ttaaggtctg acatgaccc aagccctgtc ctgcttctc tcagttctac atgagccgtt  
45901 atccggccaa tggcccattc tctacgttac agttctcagt tttatcttgc agacaaatgt  
45961 tgctttaagc ttttaggtggc acggggagtg gccaggctgg ctatgtgtcc agaaaggcag  
46021 cttcctgctt ttagaataca ttcttctgtt tactcggagg tcaagagtct tcgcttacac  
46081 tttacacaat caatagtttt ttctgctg tttctggccta tgacatcacc aatttcagat  
46141 gtaaggtggt tgctttctga gtacggatgc tgcctgattt tctagcagtt taagacattt  
46201 gggaagaaag ttatatgagt gtgtgcactt cactaccag gcctggtgca ctactttata  
46261 ttctcaaggc accaagaatt gaattattta aatatcaaat cttctgtgcc agcagctctt  
46321 ccctcccagg agtttgaaac agacctcaag ccatagacac ccccaaaaa atgctcctga  
46381 cccacacccc aaaacataca gtaagtatgt gttctaagct gaaaagttct gagttactaa  
46441 tacagacacc ccaggtacaa tggctagatt tatgtcaact tgacatgagc catagtcac  
46501 tgagaagagg aaacttcagc ttagaanaatg cccccataac atgtgaacat aggcaagcct

46561 gtggcgacat tttcttaatt aatgattgat ggacaaaggc tccgcccact gtggacggtg  
46621 ccatccctag gctgggtggtc ttggattcta taagacagca ggctgagcaa gccataaagc  
46681 cgcaccctc cacagcctct gctccagctt ctgcctccag gttcctgcca tgtttaagtt  
46741 cctaacctga catccttcag ggatgaaaag tgatgtggaa gggtaagcca gatctcatgt  
46801 ttcctctcta gctgctttag gttgcggtgt ttcagcacag caggtaagtg cacagggaac  
46861 aggatggctg tggggctaata cggcagcaca gaggtggcaa tgacccagc acctcaagac  
46921 taatgtggtt tcatgtaaaa aacaatcagt caatcaaca aaaaccattc atactttcta  
46981 ccagcaacct tagttccaag aatctatttc tccaaaaagg cgatcaaatc caaaatagaa  
47041 aagtgtttaa gcctaaagat ttgcttgtat taataacatc atttatataa aagtttcagt  
47101 aatttggaaca gttctaagta ttgtgattaa gaggtatatg actctatctc tttattgaat  
47161 tctatttttaa aaccctggat tgcctcctc atttccatca gcattatggt tgtgtttcct  
47221 tgggcatcac tcaggcactt gatagatcat aaaaatgtag gacatataca caataggtgt  
47281 aatggccatt agtgggtgtc cacgtgactc atctggaatg aactacaatt cagaaatgga  
47341 gggaacacct gagagagatt ttttttttaa ctaagtttg agtgggtgaa tccacttcca  
47401 gtctgggcct tgaggtagga agacacacat ttttgattca gatcttgagc ttggaagaca  
47461 cacctttaat gtggggccaca cctcctgctt gctcttacct tctagcacat acattcgctc  
47521 atcagcatca gagcccactt ctttggggtt cttagcatatt ctgaaggcca gctgaggcat  
47581 ctatcattgt ggactgagca attcctgtat tcacagccag acattgtttg agtagctgat  
47641 ctgggctgt atggcattac aataaattcc ttttatctat ctatctatct atctatctat  
47701 ctatctatct atctatctat ctatctatct actatctaga gattcattat ataagttcct  
47761 ttcctctaga caactctgac taatacaatg aaataactact cagctacaaa gaaagaaatg  
47821 gtactataaaa aatctaggaa agaataaaca tattgagtga ggtatcccag gaaaagagaa  
47881 gcaaatatta catgtttcct ctcatctgat gttcctaggt ccaaactctc tgaagagagt  
47941 atataaaaac taggaaagta aagagggagc ctgatgtgtg aatgtgggaa ggctttaact  
48001 agaggggaga gagataaaca ccaaaagagc gaggagagta agataattga gggatatctga  
48061 aaagataata aagagctgtg ctattaacta tatactgaaa actacctata acatatacaa  
48121 gtatctgtac acatatccat aaagagtttg aatgaaaatt tcccactctg gctaattgatg  
48181 ccatcccaa gaaccataag ctatctaata agaacttat aacacaaggc atgaaacacc  
48241 cacttttgag ttactggtct gtgttgtcta agagagtccc aaaacattat aggctactgt  
48301 tgggtgtcctt ggttgccacc tagaggagaa agagtaagtt tctatgcctg aagacaccat  
48361 ccacttcaga catagaacca acaggatcga agcagcgata ggacttaaaa gccttcttcc  
48421 tgtggatcat ctttcatggt accagaatgc aggtttccaa aggaggggag aaaccaaag  
48481 tcctaccaa ctatgatgcc tctgaaccac gactggtacg acataatagc cctaaagtgtg  
48541 cagtaatggc acacatacct tggtggtaac caacaatttt ctaattggac aaaaggcctg  
48601 gtcaacaaga aatagaatca tgccttctgc tggataccta gctaacttcc taagactagt  
48661 aaagtcatag atcttgaggg aaaacctaca ctgacctaaa ctcttaacta agtatttttc  
48721 cttgtaccta cagacagctg tagttctgaa cctcatcaa ggaatcttct ctttccaaca  
48781 aagacctcta cagaaaacca caactgatca caatgcagag tgatggatcc tagtccaac  
48841 tgaacatcta caatccagtt tctgtatcta aggctcaggg aactcgtgg aagaggggca  
48901 gatagattgt tggagccaag tgaacataaaa gtttgcttct atactgtgtc tccttgaagt  
48961 cttaataaca gggatgctta aacgggaact aaacaaggat gacatcaata gtcttgctaa  
49021 catagactcc taaggaatgc tcaaagtagg aaaaatagtc tccctcaaa aagaacacac  
49081 caattgatta tccaatacca aatggccaac tctgaaaaca tacacataat aacatcata  
49141 tagactgagc aggttgaatt tataatgtga gaaaacacac tgatgtaaca agccattaga  
49201 gaaaaaagag gcatctgttt gaaaaggaag gggtgacaac acagacttag gaaggactgt  
49261 ggagagaaaa gggaaataat ataattatat tataatctca aaaagtataa agaaaaatat  
49321 agttgaatat ttctgaatac tgacataatg tcaactactt taaatctttg tctttttatt  
49381 ccacttaatt ctttagtgaa gctaagattg ctcttatccc ccaaagtggg ccaagagggg  
49441 atcaatggct tgtgtgagtc ccagaggtct aagtggggag atgaatctga cccacgcagc  
49501 ctgactccat agcacatgcc actaatcctc accctacaat agtcaacaat gctgatggga  
49561 tgaggtacag tgtgattgaa actccatcaa aaaccacgaa aataggcaga agcaaaaagg  
49621 ctggagagat ggttcagggt ttaaggcaag tgctggcaag cctgcctatc caagtttgat  
49681 ccctgagagc cacacagtag aaagtaaact gacttctcct cggggtcctc tgggctctgt  
49741 acaccgggc atatgtatat atgcatactc tcataaagta catgaataat tataataaaa  
49801 ttttaaatata agtagaaaac ctcttctagt aatagaacta tggctaataat ttaccctttt  
49861 taaatatttt accacaagct gtatcacttg cataatcagg aaaaaaaaaa gaaatgttga  
49921 aatgttcagc tctaatatca tgggctagct agcatactcc tacacacatg aaattcgttc



49981 gcagtgcctc ttttccctga gagaagagtg aactatthttc tatacgttga ggaaaaaacg  
50041 gttgtgtgag tccttcatcc tgagctgagc tccactatcc atccctaacc tcctatctgg  
50101 tacttgtgga gtgactggat gggccaattc ccctagaatc tagattcagt ctacatattt  
50161 cccgaataca agattcatga ttgacactat gataagagct tccatgatgc tcccctcctt  
50221 gtgacacatc ctggacttta tagtatattc tctactcaa gctgaggaaa tcaagtctgg  
50281 tgaagcaaca actgacaaaag atcacacatc aatcagtggc tgttactttt cctgaggccc  
50341 taatcttact tcaattgggg ggttgaaata aactatataa taccttcggt ccattcttcc  
50401 tcatgtttac atatgtaa at ggcaactcgg gacacagcaa ataagtggcc acgttgga  
50461 tggaaatagg gattctgtat tccagatctt gcttccttag tgttcgtgtt tggatctttt  
50521 tactcagcaa ctaaaatcct caatcaccca ggacataaca gccctggctc acagaccagc  
50581 atccgtgcct ttgaggaaga aaatgttaag gataaaggag aatggtacaa cttcctgcta  
50641 ctgggggttcc tgcagaaggt ggaggcttga agtagcgatt caaagctgag gttcacctcc  
50701 aatcttgttc tccagctcta acctccaatc tgaagctcag gactgcctgc cctagggttt  
50761 gttaaccat aataagcttg ctaccactta aagagcta at atagccagat tcatccctta  
50821 gattctcagg acaaggagtt tcccaaaagc caagtactga ttccctgact gtgctgataa  
50881 tcagtatcta tttttaagtc cctatthttc tgtataatat tcataattat tccagcacag  
50941 cactaaagac ataagactgt cacttctatg attcactgaa atacatgtag cccccgactt  
51001 gacagccact tcaagaaaa aatctaata ccctagttat gtctagtttt attgtgcttc  
51061 ttctaactat acattaatga cgtttactta aattctggac aagcttacat gtaatcattt  
51121 gtttagataa ctttagggc atgaccttt aatgtthtaaa aaagtttagg tcaaaccatt  
51181 tttatthttg tattactaag taaaattagg aaataatata gaatttgaat tagaatctag  
51241 cagtatcaca gaaactaaag aaacaaagaa ataaaaatga atgaatcact agcaaacact  
51301 ttctaaaagc taaagttctt ctaataatgc ggcaaaatac aaattattht cttatctgcc  
51361 ttctagacgc tagtcaaaga aagtcaggta tactcagtgg aaaactgtca gaaaaaaaac  
51421 aagtcctatt tgtgtaactt ggggtggagta aggctagatc ctgggggggt tggagcgggg  
51481 agctctgctg cgtggataag acttaccagc aatagcaccg gctaagagca ggcttccggg  
51541 gctgacctgc ccgtcttcat ttgcaaagga agccttcacg tgggcatagc acgggaagta  
51601 gatggctgag aaaggaatgt ccctcaggaa gcatgctttg gcgccctgtg gggtttgcaa  
51661 ggagaagaaa aaccacatga agcacacatc ccacggagaa ggtcaggctt ctctggaact  
51721 tacctcagaa cgaaatattc ctggagaaga ccaaatttgt actcacacac tgaggggggt  
51781 ggggtggggac agcaaaat at aacccgagtt ctcaaagcag caagatgcag gcttgatctt  
51841 ccaaacacaa ctagctttgt cataggggggt gaagacatga gaaaaggaag ttccccgcta  
51901 ctctaaagct gagctgtcaa ctcaaacaat tttggaacc tgtctgtgac gctthttcaag  
51961 tctcaatggg tggaaagtcac cggcatttca ag

/
