# Supplementary material
Source: PubMed Central journal article supplement (PMC3670090)
Supplement: NIHMS468356-supplement-Supp_Fig_S2.pdf [file NIHMS468356-supplement-Supp_Fig_S2.pdf]

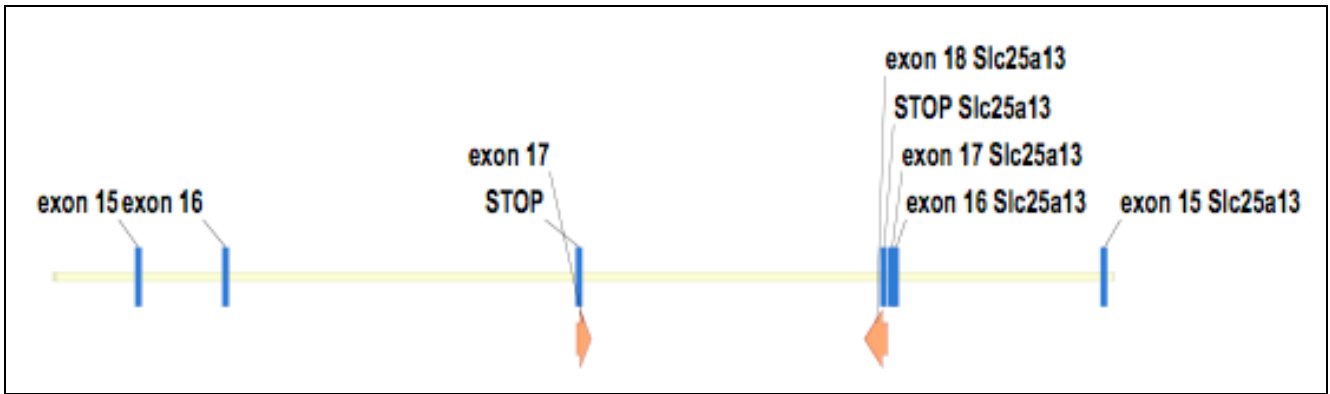

***Dync1i1* endogenous locus**

| FEATURES     | Location/Qualifiers                                                                                 |
|--------------|-----------------------------------------------------------------------------------------------------|
| exon         | complement(50516..50654)<br>/vntifkey="61"<br>/label=exon\15_Slc25a13<br>/note="gene Slc25a13"      |
| exon         | complement(40492..40650)<br>/vntifkey="61"<br>/label=exon\16_Slc25a13<br>/note="gene Slc25a13"      |
| exon         | complement(40310..40400)<br>/vntifkey="61"<br>/label=exon\17_Slc25a13<br>/note="gene Slc25a13"      |
| exon         | complement(38970..40083)<br>/vntifkey="61"<br>/label=exon\18_Slc25a13<br>/note="gene Slc25a13"      |
| misc_feature | complement(39897..39899)<br>/vntifkey="21"<br>/label=STOP_Slc25a13<br>/note="STOP of Slc25a13 gene" |
| exon         | 4021..4161<br>/vntifkey="61"<br>/label=exon\15<br>/note="gene Dync1i1"                              |
| exon         | 8206..8331<br>/vntifkey="61"<br>/label=exon\16<br>/note="gene Dync1i1"                              |
| exon         | 25123..25793 (coding region italic)<br>/vntifkey="61"<br>/label=exon\17<br>/note="gene Dync1i1"     |
| misc_feature | 25231..25233<br>/vntifkey="21"<br>/label=STOP<br>/note="STOP of Dync1i1 gene"                       |

ASE COUNT      15039 a      10669 c      10339 g      14954 t

RIGIN  
 1 ctctgcctgc ttgctcattt tattccactt tccaaggtac cgccatctgc tcttctggct  
 61 aaaggacagt cccattctg ttccatagcat gttagagaat tttcttttcc tcccacaaa

121 tgctaatagac tcctcgggaag tgtgggtgat gccctcaaaa tcattaataa ctggtttagg  
181 gaagaaaaaac agtcattaat aatTTTTaAC tGtttGtaca aatcatttag tgtgtgctta  
241 gtaaataattg gttgaattga aggagagtgt aaagaataag ggtc gatgga tttgtcattc  
301 tctctgtaaa gactgaagac cagattgaag gaccctaaag tgcctgcaaa cacagaatgt  
361 gcctaatagct agaaaccctg agtccaaaag ctacctccac ccctccctgt ggctttatga  
421 gttactaacc tccctaagct ataattttct tttcagtaaa caccatctac cttacagaaa  
481 ttttatgCGg attaatgCag acaatgtgtg tacagaaccC ggtccacagc aaactttcgt  
541 tcctgccctt cacataagtc ggtactggcc gaccgctctg ctttgtttga aagtcagcga  
601 attaaaagca agcgggactg tgtagcttca cgcacataat cggaaaggca gacctggagg  
661 cccgatgaag cctcgggccc aggctttctt acagtgggtg gccacacatg cacagggtgt  
721 gagtgatgac attttccttt tccctttctt gacatgttgc tgatgctaag catggcattt  
781 gaaaggaaaa catacaggtg aagggggcgt tgtccagtga aatttgactg ctttgcagaa  
841 cgctttccac agcaatatcc tttggagcaa tatttagtta actgaatgac ctCGggtatt  
901 ttcctagagt gaatgtttta aatcatgatg cttctatggc tttgatatac agagaggata  
961 ttgtgaaatt cctcctcaa agcattgaca gtgtttgttc ccatactgtc ttttgaaaac  
1021 ctgtgggtatt ctaaaatcaa tagccatact ataacaaatt tgtgggccct gaagtttctg  
1081 ttgcacaaac tccaaagcaa tGttcttgag attgaagaat atcaagggtc ttttggaaaa  
1141 tgттаатatt tcatgatatt agtatttacc atacattttt aaaaaacatt aagcatttga  
1201 ggaagatctt taataatgtg atacttgag acaaaataaa atagaatgat aaaaattgtg  
1261 tattgaacaa agtGtaattg ttactcaaaa tagtacgggt gttcaagtga catttgccctg  
1321 cactgggtatt ttatgcctct atgggacatg gcatctatcg gtctgtagat agaagcccag  
1381 agcatacagt aatgagttct gtaagttttc caacctatca acttatcaag gttaaacaga  
1441 gcccttgaaa tgtaacacct ctccctgttc ccaagcacac gcctactatg gacaagtgtt  
1501 gctttcaggg tgacctttgt gatagaaggT tcagccttgg gggTggggag gtgctgatga  
1561 ggagggttca gaaagacaaa cgagaaagag catttctatc aatctgggtg aaaggaaaaa  
1621 aactgagaag aagagcagtt atttccagat gtttcaaaag tggTgtctcc aggatatagt  
1681 ataattttta ccgaatttat cagtaaagaa aatttcaaag ggaaaaaaag gaagactatc  
1741 atagaatgag caggatagtt tttaaaggga ttagtatgtc ttgtgttgac agctccttgg  
1801 agaagggttG tttgaagctg gatggggttt taattgatca aaacaataat ggcattgtgtg  
1861 ttgtgtgttt gttgtatgat tgcattgtgt cccatatacct cagctctgtg cgcttagatg  
1921 aactattgac tgagtGagaa agaatacaaa gaatcacctc tttaaatcac acgtctttag  
1981 ctgttaaatga ctaaaagaaa tatgttgcatt tctctattag tggccagtta ggtataaaat  
2041 caagagtctg tggTgacatt cttttttaaa caaagagtca gattgtaata tacacgatgg  
2101 tcagtGagaa acaccagcta tttcgtactt tcttttggat aaataaggca aatgatatac  
2161 atcatgctat caggtaataa tttgatactt ggattgtcta aaaaagtatg aattatctaa  
2221 tataaacaat gagaagaagg cataagcagt agctgataaa caaataattt tggtttctag  
2281 tcatatgaca gaaatgagat ttaaacaatg tttatctaga aattacagaa taataatatt  
2341 acatcactat aaaacaaatg tttagtttgt tcttcttgg tgtttcaatg gtgggtattt  
2401 ttttcaaatt atatttctc agaaatactt ttgaagttaa aatatgacg catctatctc  
2461 tttaaaaaac atcacacaca aactcacaca cactcaaca caaatacaca cacacacaca  
2521 cacactagtt tatctacaat ctgtgctgcc ctaatctatc taaactttgt ttgcatcaaa  
2581 ccagttactt ttacgcgtca aggaaatgca aataatggaa gttacagtca ctcccctaac  
2641 acgtcgggtc attcggtttc agtttaagaa ctgtgggttt gcactgattc tcgccgctct  
2701 aatctcagcc catgtactgt gggcatctcg cattcacaag cagcacacat tggcagttct  
2761 cgctgataac ttggagcGga tccctacag atgagttctt tgaatatcca aggcagaaag  
2821 gatttgattg ttacattgta tGttatcttt tcttgatctt aaggccctgg cctgtgtaga  
2881 cattccacag agcctgagaa gagagtgcag acagctgact ggaggaagaa gacaaaaatt  
2941 cccattgttt agatttctgt cagaggatat aagaatagtt aatttctttt atctctaggg  
3001 ctttcattat catttaaatt tcattttaca ttaattgatc agggattagt aaagccatta  
3061 tgcagaaatt agaataagac aagccagatg gaatgaataa ttcataaagt ccaattacgt  
3121 tttatttctg gtgtactttc aaacttgct ctgacttctg tgctattttg atgtgacaat  
3181 attcgtctgga aatcaagtgt gccattttaa tttattatat cctctggag tggaggcatt  
3241 tGtatgcagt ggaaaaatgc tctgtgtttc ccctcagaac atcaactgta ggggtcttgg  
3301 aaatccttgg tgatttagaa aggaagtcat attttctgtg taagttcaga ggttctagaa  
3361 tgagccacat tgctccactt ggttctggcg aactaacccc atacagggag gctaaggTct  
3421 tgagtggaga gatttccact tttctgtaag agcGcaaacc cgcattttaa ggtatttgtc  
3481 tccttccctc gccgcacaaa aagagttaaa atatgaattt ggccctgcagt tggactgGaa

3541 gaagccatcg ttgctgcagc gacaagggag gtccacgagg tggcagacgt tgccttcggt  
3601 gcagagccag ggtcgccagg gaccgcccgg gcttcggagc atgccagcag gtccaagccc  
3661 ctacagcccac tgctggggttc aggctcccgc gacctgcatg cacagcttgg cctggcaaga  
3721 attccgagct aatggcagtc gcgtccacct gtctggaatg tcgcttacia ctgtgtctga  
3781 aaccgcctcg ctccgcgggt cccggccccg gccattcaa agtacacccc acccccgggg  
3841 atttatattat gccactggac agttgtagtc acattaaagc tccggttcac cttctcgagg  
3901 actttcatct cgggaagttt tatgacactt ggtgaatgtg caaagttttt aattaggctc  
3961 tctagacagc ccgaggcggc ggcagcgcca ctaagtcttc acggtctctc tgctttacag  
4021 cacaacaagc cgctctactc ctttgaagac aatgcagact atgtgtacga tgtcatgtgg  
4081 tcccccggtc atccccgcgt ctttgcctgc gtggacggga tggggcgctt ggacctctgg  
4141 aacctcaaca gtgacaccga ggtgagcgac aggcgcccgg gccagggat gggaaagggg  
4201 gaccgggtc actctgcagt ctggtccttc gtgggggggg ggggagcctt ttgtggacag  
4261 accctacaat tgccctctggg tacagtccat tgccccact ctcaaccccc aattcttgac  
4321 ttcccagaag ggaaccaaca gatgcattgg ccaaaactcc atgtcacttc atccctaaac  
4381 tgtaccagat cttagacagt taacgactct gccccacaca catcttttcc cccaacagca  
4441 caaagtgtgt tcacactttt ccctaagggg aaggacacat cgtgttgaaa taactttatt  
4501 ggcagagact tggaaaagta agcttttgtg ggtgctgttt ttagactgga ttattgaaat  
4561 gaggttactc tgtcaacgct ggctatttgt acaatttctg tttcgactcc attgaagatg  
4621 gttctctaca ctgctttctg tttagttcta ccatccattt gatttattgc tatggaaata  
4681 ttccttgtct acaatattga actcaaaggc catagtgtct aagtttatac atgtatgcaa  
4741 aactcaattc gtctttaaaa tgggatttta acgtgtcaca tttaaagtca ttcacaagat  
4801 aaaataggca tctattttaa aaaaaaacag ttgataacaa aatgaatatt tttgaggatg  
4861 tcatctgctt tgttcctctt ctttcaatcc ctcaaaagta tcgagggcct aactcagggc  
4921 cttgggaatg atgttgttgc cagggaccgt gttacatgac tattttatgt cctaaaatgg  
4981 cctctgcatc atttcttggg ttttggttcc ggtacaaata cccaggtaaa gattccatgg  
5041 gacaaggtat atatatatgt caagtaaagc aggccttttg aagttcttgg cgcaggaagc  
5101 cattcagcct ttgtaattaa ggatcctaag gctggaggac atgaaggaga agcacagaag  
5161 gctaggactt tttgtgggag gggacagggg aatttccttt ggggtgtgtt gtgtctgggt  
5221 acctataagt gcacagttac ctgtgactat caccagacaa atgtgtttct atcgcgcca  
5281 tttttccttt tacctccaag aactatggga aaagaaagt acgtaatgaa ctatgtttga  
5341 aaatgatcag aaggcacgag tgagatgcc atcactgaga tgtttatagc atcactgcat  
5401 ttaagagtaa gatgctatta ccttaccttg taatgctttc ccaaagtctt tcatcactgt  
5461 tgattaaaat catattgctt ctatttgcta gaagaaactc actcaaagca aattaaaaaa  
5521 aaaaaaaaca aaaacaaaaa cctctttcca gattgactcg ggagtgtgct atatcagaaa  
5581 gcaggcctgg ctgggatgct tccatgacac ccggtccaa agtgtacaaa gggatgtagt  
5641 ggcccacaac ctacttaata acttccacct ctcgatctct ctcctctctc cataaaagga  
5701 aagctatatc ttgacactgg cttttctttc tataggatc aaagagagaa actcagggaa  
5761 gttttgtgct taacatttaa aaactcatgg ttggtcatac atacagttga gtccaggacc  
5821 tcacagttac aaactttttt ttttttagat ttaagtgaga ttaggaaata gatttttaa  
5881 agacagagag agcctatatt cccatctgct tttgttgttc ttgaaattat tgtagtttta  
5941 aaccaaatg tcacctccac cccaccct cgcgaaaat ggctatttac cctgatgca  
6001 agcgactctt actgcttagt aatttatgct atatacatct tgtatttga attaaaatga  
6061 ctgtgccata aaaacatgag aatacttatg aatcaaagt tggagtaag gcacatgcaa  
6121 agagcgtgca gattatttta atacagattt ccgcatthga gcttcaaag ccacaaatta  
6181 ttacagatat attttccttc atgtactcat taatttttag catataaaat atgatagcat  
6241 gttttatatt ttgtataata gctatgaaaa gaaagcattt tggataatct tcaaaaactc  
6301 acttcagtta cattatttac atttcaagta aactaatttt tttagaagca cgttagacat  
6361 tgttttaact acatgagaag gtcagggttt ttaaatttaa ttttttagct gtgttcctat  
6421 gaagattaaa cattttactc agctttttaga ttattcaagg ttaaattcta tgtgatgctt  
6481 ttaagtcagt gttaaaaacg aactttgaag ggtctacagc tgaatcatga cttgggtttc  
6541 aggccagccc agcgataata aagtgtattg acagaattat agtctatcta aattcacatt  
6601 gtttttatcc tttgcaaggt ttggttaaaa attcagactc cagcttgac agcagggacc  
6661 ttgattgtag aaattgggtt ttgttttttt tttttttttt aaatgagctg gggattttca  
6721 ttttacatth ttgttcacaa ttgacatgca atgatttaag caggtgaaaa gaatttttta  
6781 ttgatttcaa gatgaagttt aaacgtagat tcttacatat gatggagttt ttattgctgt  
6841 tttaaagata ggaattggct caatagtttc ccataaacag atggtttcga cctgtgact  
6901 agctgaatgc tggggtgcta tgtggcagag cacaccgtgt ttccatgttg gcgagattcg

6961 cttactgagc acaggtctca cagaggggca gaagatgctc gcagtgggcca tcttccatct  
7021 ttctttccat tttcctttca catgtaccat cttctctttt aaaggtgtgc tgtcatttct  
7081 gaatcaacac cctcatagaa ggctcaggag ttctaacaac ttataaactt ccaaccttga  
7141 agacaagagt acacacactg acagaagaca gatcgagaca ctcaaatcc tccctccaca  
7201 taccacgggtt cttgagatag acagacagat aacagatag acagacagat agaccgactg  
7261 caagttctat ttcagcattt cccagttcac tgaataatg attactagcc caattatcaa  
7321 tggttgtgga tttccagtgt ttgttaaagg tgccacacac atagccgcac tttaacagga  
7381 tgtctctgta aggacagtga caaccttgta gaccattctc catatcttgg tgttgccaca  
7441 gggagaaaga aagataaaag aataaaaaga gagtttatga ttgattcttc aaattttgtt  
7501 tttgtttttt tttaacctgt acacacattt attttaaat tttatctaca ttgatgtttt  
7561 gttttcacat acatctgtat gaaggtggaa ctgtaactat aggcagttgt gtactgccgt  
7621 gtgggtgctg ggacttgaac ctggtccttt ggaagagcag tcagtgcctt tgactgctga  
7681 gccatctctt tagccccctt aactgtatac ttctgttctt tggatcacc tctttctggt  
7741 aaggtagata attctctaag aattagcaca tgtacgctag tattgttatg aagactcaag  
7801 ttgtttgagc aactgactgt tttcctaccc taccattgcc ttttatagat cctcaatctc  
7861 tgtaaaacag caagcatctc cctgtccccc gacatatccc gcatgatctg atggtcaaac  
7921 gttgcattta gctggcatgc ttctatgctg gacatacact tgacaaaatc ctgctgctgg  
7981 ctgccacgac ggtgggaaag tataatccatt tttccctttt tgtttctctt ttctactccc  
8041 taagtcagtg gagcgtatga ttccagaaca atgaatcctg ttcaccctt ctcattggta  
8101 gaagtggctt tgtgactgg aaggcagttg tggagtaaaa cacatcactg catattagta  
8161 tagttaaatt catattcatt tttcatgtca taacccttt ggcaggtgcc aacagcaagt  
8221 gtggccattg aaggagcatc tgccctaaac cgagttcgtt gggcacaggg tggcaaggaa  
8281 gttgcggtag gggactcaga aggccgcatt tggatctacg atgttgagaa ggtacgtatt  
8341 ttttgttctg ttttgtttgg ggacaggagt ttggcttgtg tttccacttt aaagacctgc  
8401 tggaaactatt aacaagactt tccgagccac gagaacgctc tctattgctg ttgcaagttt  
8461 ccgttgactt cagtgtgagt ttggagacac ctcttgggg tctaatttgg cccgtgtctc  
8521 catgcacagg acactttcgt gaatgatctg gactctttct gtttgtgtgg tagaaacccc  
8581 agcttggcag gcagaagctg acatgggatg ctgtcgggtg ctaaagctgg ccaaactcat  
8641 gctaggggtg aacttgtaat gcaccgttca ctccgagaca gtgaaatagt atttagaatc  
8701 ctgattcaaa ctcatactat tgaagtacag tgcttccaac taagacgact gagacgaatc  
8761 aattttatat aacttttgac atttatgaca ttatcatgta ggacctgtgc ctcttttggg  
8821 atgtcttatt atatgacatg taaaattaag atataaagag aatgccatgg catgtatcaa  
8881 cgagaaaata atacatcttt tactccagaa aaattctgca cttgtgtcct atcttcactc  
8941 tgccattgct gatcaattgt ggtgtttaaa tcagttttct tttacttctt gagaaagtat  
9001 ttatttaaaa accttgattt ctagttaagg taaggatttt tgttttggtt tgtttttctc  
9061 ttaaagacaa agaaaataca ggaaaggtaa ctaaaagtgt tgtatacgtt tacttaggca  
9121 taatttgaat ctacatttgc attctgaaga gaaaacagac caagtttgta tgcatagtgt  
9181 gctaggcctg aaagtgtctt gtgactacct ggtagactag ctgagctgat ctcactgagg  
9241 agacgtcttc agtttcacca gtcagcatca tgggactctg agaatcccag ctggttgctg  
9301 agcagaggag cctctgatgg aacattatat aatgtgctgt tctacagctc attgtgctgc  
9361 cacaagctaa acacggtttt cagatttcag ctgggcatag aaactgaata actttagaga  
9421 tggggctttc catcctagca tgcaaatgc taaatacaac acttaaacac ctcttggctg  
9481 tcctgtagtt agactctctt cccctgccct agttattcct gatgccaca gttaaagatg  
9541 gcaaggtggc agagacgatc aacactggcc tacacgggtg agatccagat ggcaggtgc  
9601 cccaccattt gaagctttgg aaagcgaatg acatttgagc cagaaatatt tattaccat  
9661 gattctctag ccatgttttc tgctgtgaag tttctttatg tttgatgtac ttcttcatgg  
9721 tcttcaccca gataagacta aacaacaaaa ccaatattta ttggtgatct ctttctcaa  
9781 acgtgtgtgt gtgtgtgtgt gtgtgtgtgt gtgtgtgtgt gtgtgtgaga gagagagaga  
9841 gagagagaga gagagagaag agagaacaag ggacaattaa acatggtttc tttttctct  
9901 cttgtgtgct cttccttctt tcttctctt cttccttctt cttccttctt cttccttctt  
9961 tccttcttct cttccttctt tgataacaac tgttttttgg aggagaaaaa taaaggtgaa  
10021 aactgcccag aaagagcaga agatagtcga agtattcaat cccttctctg actctcaaat  
10081 gcatactgtc cactaacttt ctttaggtag tacacattac ttgttttccc ttttgttcta  
10141 gctagcgtaa caatctgggt tatctcataa aagcctctct aaagacctct atgcttatag  
10201 aatattaca taggtataga gacacagctc ggctaagaaa agaaccagcc tatcatggac  
10261 atcatttctt gcaataaggt acattgatag cttgtgcca cagtgactgg gatatgatgc  
10321 tacctggaga gtatatttga ttttgcaaaa gttgcttggg ctggcatgta tagctgctca

10381 acatctttct aggacactat catcatctct aaactgtgaa ggggtggcagt gctcatgtgt  
10441 ctgctatcac tgcaggctcag gctggttttc atttttgtat tactgccctt gcttttctaa  
10501 gtgatattac aggctacaga aatgtctgta gctagaggcc agtctcgcct attgtctgga  
10561 gtctagacag gctatagaaa aatctctgtg acatataata ggccaaacaa tttgtagggt  
10621 tgtttatcct taaaaattca ccatgaggag aggaaagggg agaataatacc attttactga  
10681 gcataggtaa tgttacaatc tctagtcctt ctctgaatga gtgaaagcca agcttcaaca  
10741 tttgaacaat tcttcctata ttgttcgatc atgcacaaag cagtggttag ttgagactta  
10801 acaatgtcat gtagagtaac tatcattttt ccccctaagt gtttctgtaa agtatcttaa  
10861 tttatttttg aggtgaggag agtcgtttct gtttctcctt gctgactgct gtagctttct  
10921 ttaaaccctt gaagaccaca attgtcaagg caccagtac tgacaggaag gacaaagtct  
10981 tacagttgag gcttactga agctaacttc ttagagatgt tagatacacc ctgggcagct  
11041 gctgccgtta ctgtaattcc tatcacatcc cttaccagcc tggaaactgac agcgtatctc  
11101 tgaacttaga atggagggat gcaactccaa cagcaccttc ccaatgcgcc tctactgcag  
11161 aaagccacct ggggtgtgctt acaagacaag ctggcctgtt ggaattaga ggtcaaactt  
11221 aaggctgatg agaggaagag attctgagca ggaagcaatt taaatagtaa gaaatatagt  
11281 gggagaagaa acatgtatgg cattgaccac caaattgtca gtaggctgct ctaccacgac  
11341 cagcattcag catcagctct ctgggtccca ttagagttga attcctcacc agggctcatgc  
11401 tggcctttgg aaagccttga gagaaaaaga taaaaact tctagataac tcttaaaaca  
11461 tagtctgtgt accaatgaaa agggtagttt ccagaatcct cagtgttgat ctgcttgctt  
11521 tgagatccca gtaaaactgaa gaggtgtcgg tctgtgaaaa gccctctcac acctgtttt  
11581 tccgttgctg ttggcccaag acctctgtga gactggagga agaaggcagc tgctccttt  
11641 tgccatgatc tcgttctcct ggtgaagcca gctacactgg tgactgggtg ggtttcacag  
11701 ggtcctgggc ttcaaggctc tgagctagcc cagtgttcta ttgtcattgt ccgacagctg  
11761 ataaacagtt gttaacaaga ggctccatat ttgtattttg taatgggcc cgaatattag  
11821 gtggcctgtt ctgttcctaa gaaaattgat ggtaaaacaa ataagaaata aatatatttg  
11881 gcctggacct ggatcattgg gaaaaacaaa gagaaatctt tagaaatgtg gctcaataga  
11941 gtgcgtacaa catcagctctg ttacctactt cttaaattat aagaccataa gcctcagatg  
12001 gtgcattcgt gtagtgctta agccaaggta gggttcgatg acacctcccc ccaaccccat  
12061 tcccatccca tcataattta agatatacta tttctttgga aagttttcta taatttttgc  
12121 ctcattagat gaagcagggt gggacagact gtcactgttc tctcgccatt gtaacttccc  
12181 atcaaacacct ttggagacat ctccatttcg gtccaggtaa gaaggccact gcacagaggg  
12241 actctgggtg caccagttgt aacaatcgtg tgccttctct accccagctg aggtgcagct  
12301 gctgctggga gtcccagctc agagcccaa agatagtgtc cgtctctatt acgtacaatt  
12361 atccttagga tgatcgaggt ggctcagatc cagacactga cgcaacttat tagggacctg  
12421 tgaagaggt aacagagggt tgtgtaggag ctactgaga tcaacaagtt gactttgtct  
12481 acccagcccc catcttcctt actttttgct acatttaaat ggcaaaagtg tgagtaatct  
12541 ctcagggcct gtaactcggg aagtaaaaac ataaagcagg catattttta agcaggctac  
12601 ttgatgctgt gtttgtatag cacacactct tgcttgtttg atttcagcat tgtgtctgga  
12661 aatctattgt gcatatttat tttcacagat aggggcctat ttccttcaca gaacagggtg  
12721 ttaacttcca ttagtataaa tagaagctac acaaatccag tataagacaa agagccccc  
12781 ctttactat ttggtgtaa tttttattct atttgtgctt tcaaaaatca cttaaaaaga  
12841 aagtgggtac atgcatcatt taaaattttt gaaatctaaa atcaagggtc gaagagccag  
12901 cccgcagtt aaggatgctt gctgctcttc cagaggacc aagttcaggg ctgagcaccg  
12961 gcatcagact tttcacaact tcatggaact ctagaggatc tgacaccctc cgggcctct  
13021 tagagcaact gcacacacgc acgcgcacac acacggacac acacacagac agacagacac  
13081 acaccagag acacacagac acacacacct ctaaataaaa gaaaaataga tccattttta  
13141 aaaatgagcc tagcctttga caaccttttg agaaatgtct acaagatgca tgacgctcgc  
13201 actgtgggtt ctcatcaat taattagaac atgagagaaa taacaagcca caaattaagc  
13261 ctaactataa cctcagatgg atttagatca gaatacttc acagaagaac tctgttgaga  
13321 actgctggtg tttgtgtgtt tgttgtttgt ttgcttcaag tgatgtgtga atgcacatac  
13381 ctcaaagact taaaactaga aattacttag ctaccgtgtt cttttctga caagcaagct  
13441 gtttctgcat gtatacacia cgggtttctc actgcgcatg cgccttgtgt ctagaggat  
13501 tgccgagtcc tcgtgattga tagtcagct atctacctgt ctttcttga gatgtgttt  
13561 atggaaagcc cgttgtcatt gttaaagctt cactgcagtc acacggacgc ggctgtcata  
13621 aatatccctt aacgactacg ttggtgctt atctgaatta gtcaggacgc tgtgcgaagc  
13681 tctgcttctc aaagaagcag attatcttcc acctcctatt atttctttt ccattaacct  
13741 cttccagggg agatttcgtt tgcagttctg ataaatacct gcagctttca gatccctgat

13801 tacatTTTTTT tacactgtac acgtgacaaa atttcaaaac cgttttcagc ttaaaggagg  
13861 atttgcaaaa taaaattatt acctagaaac cgtgacttat gaggacggta aatattaaca  
13921 cactgactgt gtttgtctga cccactgagc aattagtaag tagaaatatg catatgtcct  
13981 taaattgaaa ctcttaactt tgggaacaca aataactcat ttggtattac cactcacgag  
14041 ccagaatgac agcagttata tcaactacaat tcaatgaatg cagtacattt gtcaacatat  
14101 aaatgcattg aatagttcct gggatggaaa acacaggtga acatgttaca acaaagtta  
14161 tagctaaaaa ataaaaaata aaaataaaat gtgattttta attaatgatc tgtttgaaga  
14221 tttttaaaat ggaagtaaaa aagtagattc aaaagtttaa tcagaatcca aaaagaaaaa  
14281 tgacccatgc tataaacttt aaaacagtga ccaagatggt acttgtaaga actattaaaa  
14341 aaaatacctc tagggcgtgg gatataactc agtggctaag agcttagaca gaaacaaaac  
14401 aaaacaaaaa tattgttttt caacttttgc gcagccagca agaataggaa taaacagaaa  
14461 tttccaggag tcatttctcc tccagtttgt cctaaatagc attcagtaga gaaaaatctg  
14521 ggaatgctag aagtcggagg gggcctgagt ggcacaaaat caacaaagca tatttataga  
14581 ttttttcctc cagtggatta tacgaagcag taattgtttg ctcttcacag tttccagcag  
14641 gacaggggat acattattct caaaagcagc ctgggtcctt gtatgaataa ctgctctcct  
14701 tgggaattgg gtagacagaa tgacaagtag aaagttaaac tgaagcctgg gtattaagtc  
14761 aaacaagagt tccctcgcga ccaactgtg taggaaggta gccgtgcggt tgctctcgcc  
14821 ctgagctcaa gaacataggt gacagctcag cttagcagt ttccaggagc agggccgggc  
14881 tagtgtcact tagcaacatc tggttgtgac catccaaggc gctgggtggt ctcataga  
14941 aagtgtgcct gcaactgtct agagtctcga cgggccatgg caaggactgc tttctttgat  
15001 ggagaaacaa ttttagattc tccagctgat gctgtacaat tctttgggtt tccccttctc  
15061 agtgagagag ttgaagacag ggactgtttc ttccatggta ccaagcggcc agataaaagc  
15121 tgacaatcta aacccaaagc tctgtctatg gtgtctatgc atttgataac gcaaacactg  
15181 gatttgtggt tgtgcttttt agatttctca cacattctta gggtagagac caggcattga  
15241 actcaaagta cacaaaatca tatttgtatg ggaaatggtg atagtaataa acatcattgt  
15301 aggaaaacag ccaatctgaa ttagtatatt aactcacttt tcagtcatag taagttacat  
15361 gcatttaaaa tgattggagt aaaataatgt ataattataa ttttagtggt aacttgattt  
15421 ctctgtgca aagtgcataa tttttaaag aaaggaaaag gcactatgaa ttccaataaa  
15481 attacttatt ttatagtaag tatggtagca gccgctcca tttgataagt atatgtgtaa  
15541 aagaccgtga tcataattag attaattact atataaattg tgtgcttatt gaggtagcat  
15601 ttggtttatg aaaatgggtt tacagtatta aaatcttttc aagtgcattt tttttccaaa  
15661 attgatacaa agtacttaca actttcatat tttgtgagtg gttgactaag tggaaagccc  
15721 taatgttaag tttatgtaaa ccatggtaaa atgtgtctag tgcttttcaa cggcctatga  
15781 atatatacct cctgaaaccg atggcagcct gacattctcc gtcttcagga tctgtctgcc  
15841 atttctcagt tgtctttggt ggttgtttga atgctgaagc aattgtcatt agacgttaaa  
15901 cgttaaaccg tttatgactg acaaattgta tgagttttat aattgtaaag ctttgtgttg  
15961 attgtttttt ggttggttgg ttttgtgttt tgtttgttt tgatttgttt ttggcgtcct  
16021 gaggtaaagt tttcttgttt agctcatctg tcctggatct tgctctgtag accgactgg  
16081 ctgcaaacctc acagaaatcc acctgcctct gttccctat gctgggatta aaggcgtgtg  
16141 tcatcgtctga caccaaaact gttaaatttt gtctcaaaaa agtgtcaatg agagcagtta  
16201 agtcaaatca catcctgcaa agcccagtat aaaggctctgc cctgccagga agagagactc  
16261 tttggctctgc aaaaaacctg agactttttg gtttggtttg gttttttggt gtgtgtgtgt  
16321 gtccatgtgt gttggcatat ctaaaataaa atatgaaatc aaatatctgc ttctgtgttt  
16381 atatataaat gcatatatat cacatagggt ggacttgaaa atgaggaaga ataaatgacc  
16441 cattatcccc ttgtcaagaa agaattaaac gtgtatttcc tagaatatca gctatcataa  
16501 catcttttac cttggatttt ttttacttga aataaattaa ttatgtatca ttaagtaat  
16561 agccagtctt ctggatttgt agaaaaaac ttgtcccttt tcctagttag caggccaaac  
16621 agatcgggag cccactccta ggctgtcttc tggtgacaag gtagtcattt cccagtattt  
16681 agattaaatc ttttattcct attgaccttg gactaagct ctcttgaata gtaattgaac  
16741 accttctagt atctagatc ataaagagtc gacttgtcta gcaaatataa cagcaaagta  
16801 gtataacctt tggagaaccg aatctgtaga aacacacca gagataacgt cctcctctgt  
16861 taaggcaggc acagcgtgcc caacacagtg tctgtcatat aacaggaatg aatgagtcct  
16921 ggcgtgaagt gtgacgggag agttaagcaa aagcttaatt gtacaatgcg ttcagaatgc  
16981 agcctccaaa ccgagtacag tctggtagcc acaggaagtg tgactgtatg tgcacagaaa  
17041 aggagtttta gaaaagactg tttgtccttc cagtcattac ctggctctcc tccctccctc  
17101 gcttttagaa gagagagatt gccttggcgg ccaatgcagt gaaaacctag tagttgactc  
17161 aaacacttgt caaccgctag aaaaatgctt ccttttcatt gtggtttttt tttttttttt

17221 tttgggacac tatagatatg ataatcatg aactgcatta taaaaatact tcttttatgc  
17281 ccaaacattc cgtaggagga aatgacattt cttttattac cttggtaa at gtttttaagg  
17341 tgttttagcga taagctttct ttttgtcaaa actgcttaga ttccgtgggt gctaggaatt  
17401 tactggaaaa cctatagtca ataacatgcg ggaagaggca gcagcatggt tagtcagcta  
17461 atgtggggag aggcttgtct aggaaccctt tctttttgcc ctgcctctct ctgtgtgtct  
17521 tttgtactat ggaaaggag gtgattggag ttttaggaagt ttattctcca tcattgtcca  
17581 tcagccattg tttccagcac tttctgcac tttcgggctg agaaatggat tgttcccagt  
17641 agtagacaaa ataataacat ccaacaattt caggagacag gcagctgata tgatttcaat  
17701 atgtgcacaa gcaagggcat ctctagggct tgccgaatga ggtctttctt tctcagctgt  
17761 tgttttggtt tggttttctc tgcaggaaaa cacctctgga ttttgggtacc cttgcttaca  
17821 ggataaattt tagcatgaag aataattgta actgttaatt tctcaagaca agtgtttaaa  
17881 ttgcttattt cttccatag ttactggctt actgccactg ccagaccctg atctgttact  
17941 atttactttg tcttttatgt ctgattttcg tttcttacct tattaggtgg gaaaaaaaaa  
18001 taacgttggg ttgagaaaca tcaccctgtt aaagatagag gaaaaagggc tttggcaaac  
18061 aggtccaggg tagaaagcag gtgacctccc tagtaatttt aacctattga ctggctggta  
18121 atagcaggct acagagcaga tgtgcatgcg tccggctttc ctgacttctc ggaagcttct  
18181 tctaaggcta agtcgtcccg ccacagtcta cctcgtgggt gaaggctgta gtgtgtcttc  
18241 gcctgtgtag ctgctcctg gcacaggatt ctggctcctg gtttctcctg ttgctaacag  
18301 ggacctagac cttgcctttc tgagaattaa acacagtga gctgcgttta tgtgaagcgg  
18361 gtctgcccgg ctgatctaac gtggctgttt cagaacctgc tacatcccac tttgctccca  
18421 tctgtgtgtc aaaaagcaaa aaaacaaaaa acaaaacaaa acaaaaaaac aagacaaaac  
18481 aaaaaacaaa caaacacaaa caacaacaaa acaacaggct ttctctgaac acagatgcat  
18541 gtgtgcatgc cagtgggttt ctgctctcct ggatttgggt gccattaata tctgtgggtg  
18601 ggtttgtttg gttttaacct tttgagtcta gaggagttaa actgtcattc tgagggaatg  
18661 tacacaagct tccctcattc tgtaaggcac tagaaacagt gtgcattaaa ataaaaagg  
18721 catttgtaca atatcttttt agcagaaaaa tttcctgctg gtgttaatat tgaatatgac  
18781 atcgttctcg tgtctgttca ctatcggcgg ttcatgttat agccccacag acttttttta  
18841 aatgactcca cttaattgaa agattacaaa gacactgatg aaccacacat ccacaaaagt  
18901 atttatcttg aacctagaga ccacctcact tagttttttg gccatgatta atggaactga  
18961 gaaactaatt gagattatgg aatatttttt tcaacctctt aattatccaa ggttttccaa  
19021 ccatgcattt gtaaatggtg cctgagatat attttatcac aaaaagattc atagctagaa  
19081 gtgaactgca actatttaat ggagtataga aatgatcctt gaaacagtct ttactgcagc  
19141 tatttaaaat cagctgctag ggactataaa tccttagaat ttactgaaaa atgagggaga  
19201 cttgacggag gactgttcag agctgttagt tgtgtgctta taaaaagagg cacatgaatg  
19261 atacctgtgt gtttaacccc gattataaat aatcacttga tttttattac aatgtgttca  
19321 acaataatcc agccttataa cctgtgggta aagtagaatc ctgctgcaga aaatgctgta  
19381 acaaaaaaaaa aaaaaaaaaa agaaaagaaa agaaaagaaa aagaaaaagc tgcattgaga  
19441 tgcattggtc ccatgtggaa aaataataga ggtgtggaga atatttgc atacgtacac  
19501 acacatatat atctagaagt aatataatata tatttaaat taattttaat ggataatata  
19561 aagcaactat gacaaacttc tcttacaatc aaaaaaaaaa aatctctttc tttagttatc  
19621 ccagtaaagt tagctatttt ttttttaaaa caaactattt aggtagtcat gtgtaatatt  
19681 cagagaaata aaaagtgtct caagataaag taaaaaaatg cagtcttaga gaggtaggaa  
19741 gaagaaaaac aggagagata gaagaggaaa agaagcaagg aaacgaagg aataaacatg  
19801 gagaaagaaa aattagaaga agggggtaaa catggagaaa gaaaaattag aagaaggggg  
19861 ataaacatgg agaaagaaaa aaaataagag acatcattta acagggatta taaggggcca  
19921 agcactgtgt tcatttgttt ctttcttact catgttacta ccagtcatta ggtgtactct  
19981 caaatttctt tcagctaaat aaggagatc agagagggtc ctaaggacac acagcaaaaa  
20041 gtgacaagct gggaggggaa aacaaaacaa acaaaaacaa acaaaaacaa aacatcattt  
20101 ggctactttc tgtggtggat gaaagccagt tctggcttta tctccagttc tagctactct  
20161 cctgtctgtg cctcttaciaa ggtacccaag atgcccaggg gggacacact atggtcagac  
20221 tcaccagtca gtgaggctac aggcagctgt tgaccactt agagagcggc tcagctcccc  
20281 tgaccagca acacaggtcg ggtggacaga aggaatatgg gagaagttaa aatcatccac  
20341 gtatgtgatt tttttttctt cctacaagtt tctgtccttt gctctttgct tgtgaccttt  
20401 tgtcccctaa gaattttgga ttacagtctt tggaatcttt tagcgggtaa ctcaaacgc  
20461 attacctgcc ggccattcta ctgtggaggg ctggcccttt tagagtgtga ggtgttacct  
20521 gccccacag gacttgtgaa actgacttgg gaagactgtt tagctgcctt tatttccctt  
20581 ttccttgtgg gtaaagatgg gtttctta at gttctcataa cagtcagagt tcattctttt

20641 aggaaaaaat ggtcctcaga agcatactga agaacaggtg taagctacct gtcgtgtttt  
20701 aggaccctct ttcacagag tgacagctta cagtgtgaat accgtatgaa ggactcagtc  
20761 tctcttcact cagattacct ttctgtctt cgccacggct ctgttgataa atgggccgat  
20821 gccccatcc ccatttgaca atcgaggcaa tgagaggata aagcctggct cttgccggca  
20881 actgaaataa gagtaagact cgattgtcct gaccgagtat gaggtttatt tccccctctt  
20941 tcttaacgcc aaattgctac ctcaataact acctttggcc ttcaatcctc tggctgttaa  
21001 tacaggtca ttccagatct ataaaaggtg ggtgcttctc gagctgagag tttattatct  
21061 tagaaatcag agccctcggg gcttaaggca ttcaaagtct ttaaactctt taccctccc  
21121 cagattaggc agcagttctc aggcaggtg gaccagctat gggtgagctc tgctctgaga  
21181 agcagtgga aataggagtc ttccatgacc tacagtgtga ctccggccga ccaatctgca  
21241 gcagaaaatg cttccagatc caagtgggcc caacggaagg tctcgaaagt ctggcattgc  
21301 ctttatttca ctatgctgtt ttttctcctt attgcctctc atggatattt caatggatca  
21361 ggattatcat caccatgaga aatgcaaata cttttccgat cataatctat ttatttatgt  
21421 ggagaccagg ttttactatg tagcccagga tgtcctggaa ctactatgt aaaccaggct  
21481 ggccaccaa tcagagatct gtctgctctt gcctcccaag ggctggggtt aaaggcatga  
21541 gccacctcac catgcaaca gtggaatga tttaggaatt attgaaaca gttctttgca  
21601 aggggcagg gtgtagtcct caatggtgct taggtgctct gcatttttag cctttcgtgc  
21661 cttgatagaa actgaagaga ggctgaagca atgcctcagc tacctgcttg acagggagac  
21721 atcacttaca gtaagaacac acttctccat gctattcagt ttctgaatct acgccagtat  
21781 gcactcattt tggccaaagc cagcattcat tttcacctcc acttcccggg catcacattt  
21841 caaaagggtt gtcaagggtc tctggttcta acacagggcc tggcaccctc gctcaatcac  
21901 tcgctcgctg tgcagctga ttagggtctg ggtaggaaca aagccttttc ctaaccagtg  
21961 agtaaggagt ggttagaaac gcccagcac ttctctcaac tccttgctct gtctgagaac  
22021 accatgaaag agactgggaa cttcccaggg taagaaggac agctcagtc aaacagattt  
22081 tgttttagagt catagaaac agacaagagt ggccatcccc tttgtgaagc acctgtttgg  
22141 tctcacctac aagtattca gatgccaaca gtggtgactt cagcagtgga aatgacctgt  
22201 gaatacacat tcgcacattt gggctaagat tacacttaga gtgtttcctg atgtgatgtt  
22261 tcattctaaa aatggagcag tgtgctgtgt ggcttctaca gcgaacagtg cattcaggtt  
22321 gggttatttt tatagccaac tgggtgaaaa ggtgcaacgt atgtgctagg aaaatgaact  
22381 tcaagattcg agaagtaatt gtgtttttat ctttctgtt ccagaatttg atgtagacaa  
22441 agcaaactaa ttttctgta atgcacatgt acttcaggaa ggaaaacact tgagggaatg  
22501 aaattttaaa aaaaaaagc ttaatattgt tgtatatttg tgtgaatgtg tggcgtgatt  
22561 tttacacaaa atattattag cttattagca agaagaatat taaaaatgc cttaggcata  
22621 atctgcata ttaaatgcct gtgaagacaa acctcatat ggaaaatcat gttttagcgt  
22681 ttaagtattt tacattgggt tcagttccat gaaagagaat agtttaactg ctagaataac  
22741 tgcatagttt aactgctaga acaattttgt ttagtagaaa catttaggtt tgagaaaatt  
22801 tagtttttat acaatagaga tgtggtttaa tataacatgc atggttgcca gtttcaacct  
22861 gtgtctggcc actatttgaa cttgatgatc cagaatctaa acagaggtca cttcttaagc  
22921 atcttgctaa gattactaca tttcctgttc tgatgcatga atcctataca gtgctatcaa  
22981 taaaatgtta tgcaggccat cagatgttaa ttttttctt gcatgaagaa atagtatagt  
23041 cttatgtgtg tgtggggggg ggggtcctca tctgtctgta agcagatgct gctgggttgg  
23101 ctcagttttt tcttcaagtt taacgtcata tagaggtgag aggtgcttta gctttgtaac  
23161 tctcccagct ttattttctg agagaaaag tcatgctctc ttgattgagt tcctatctct  
23221 cctccagctt tcggtacata gttctttttg caaacattag ctctggtacc aggagaagga  
23281 aaggaaacat ggacctgttc tttacttaa atgatcccaa ccctcttgcc tgtttatgct  
23341 gttgggttagc tttttgagt cttttagttt ggggtctca tttcccagg gaagtattat  
23401 ctttaattga agacaaaat gaagactagt gaaatccgag agaagatctc accataagga  
23461 aactggtctg agctaagggt aatgatgtca ctcggtatta ttgtgaatgt gtgtcattga  
23521 tgcaagagaa attttagattc atttcaataa ctaggggagt gtcctattt cactagtcca  
23581 taaagtactc atatgtctga atgaaactct cactggagaa gcatttctga taatgaactg  
23641 aatgctttcc cacctggaca tcagtttcag aattatattt tttgaaacgt ttgaccttag  
23701 tactagaagt cacttaagag catactttac agaacggcac tgccactctc cagtcagttt  
23761 tcttgacag atagtatcgg agactatcat ttctctaat aaacccttaa aggttctaatt  
23821 catctggctg tgtatagtga gaaattttct agttatagtc ataatttgaa cacttacttt  
23881 cttcttctc tctctctccc tctctctctc tctctctctc tctctctctc tctttacttt  
23941 taataatgta tattgatgga attgattgtg ttcttaattg cttaatgtat atgggacata  
24001 tggatatcat gtgtgggata ccatgtgtgg tcctagtatg tagatggatt ggtcatacca



24061 ttttacaggg tgaacaaga aaattcttgt aatatagaaa tcaatttcat tgcctatgcg  
24121 ctcttcagc attctactca gtgctgttca tcttcagatt tttttttttg tatttcaaac  
24181 aataataatt ctttttggtta tctttaaaca actcatttgg gatgctatgt agtgcaatca  
24241 taatctttat tgcagctaag aaaaatttta tgcaaaatgt ctacacaagg gtatgttaat  
24301 tcctcttcat tgaatggcag acagcaaaag acaccatttg ggaagtatca tgggaactccc  
24361 cttttggcaa atcaatatag cttatcaatt caatgctgaa attgcataac actggcagag  
24421 gtacttgctg gttttgtagt cctggtagga ttttacttcc ccatgcctca acccctacat  
24481 cctgcttctc gttctataaa atggaaataa tttgcttgca tacatagggt aaatttacca  
24541 cacctaagac tgctctgaga tatgagttaa tatatgtaaa gtacttagaa tagaaccttt  
24601 ggtcagtgct agttagtcct gcagttactc atagccatca acacagaccc tgctggaaat  
24661 gctcgaccgt gaccttctat aggaaaggct ctgtgcatat gtaagctatt ttttctccat  
24721 gtgtattgac tcattaatgg ctcttttagga aacaaatcga taacttcgac tagaaagaaa  
24781 gtgccgtagt cattctgaaa tcatggttaa taatgcagcc tttatttgct gagttcaccg  
24841 taggacccaa gaacaagag cgctccttac tatgagtgtc ttaatgtggc ctctgggatt  
24901 gtttagttaa cacacatttt aaaggtttta tgcattccct gagtgategc cctgctgagg  
24961 agtgaagctg taggttaagc tccagacttc aggtccccc taattctcac agtatttggt  
25021 ttcctttgca tcttttggtg aggaacggct gttccgataa caaggagtgt aagatacaag  
25081 agattatctt gcttatcatt tctctgttga tttgccttgc **agcttgccgt tccacacaat**  
25141 **gatgaatgga cacgatttgc ccggaccctg gtggagatcc gcgccaacag ggctgacagc**  
25201 **gaggaggaag gggctgttga gttagctgcc tagacatgag atgagtctgc ccactctggc**  
25261 gccaccctt ccatgctaga actcagtctg cagtcaaggc ccccgctgcag tgtttggcgt  
25321 tctttctgta **tcagtatccc cgtggcatct** tgggtgccat attgtgcagt gtttccccat  
25381 attctccacg tgtacctact cactcgaat ccacccagc gtttctacct ttgtgtcccc  
25441 gtctcaaaaa caaatggggg agggaaacct taggggttta gttgttgctt ttaactact  
25501 tggtagctgt atttaatagc tggaaacctc tggttgaatt tgtgcttaca tgtacttctg  
25561 gcgtagtcct attaaatcca tatgaagcca gatatgattg ggtgcagatg tgggtgtgct  
25621 catgatatgg tacagggcca aagacttgag atgtgggtgt ttacatgggt attcgcatta  
25681 tgaatggatt tactacaaga acattgctgc tcttatttta ttgtaatgtg ctgcatgaa  
25741 catatttatt tgaagcatt aaaataaacg atcttagagc atgtgcgtaa tgagaggact  
25801 ctattttctc tgctgctgct gaggttacct taagttcaa ataacaatta cagtatgcca  
25861 gttccactga gaacacggag tcttttagagg tttgttgagc tgaacggaat gaattttaat  
25921 gcctattatt tctatgcact ttaacaatat ttcaaatata gttgaccatt gatacttctc  
25981 gtccaagcta gcacagccct gcaaaagtct gcggttccta aatatgacac aagtattact  
26041 aagaaaatgt tccaactagg cttgtatcac tgtggggaaa tgttttgctt agcagaaaac  
26101 ctgacatgaa gtttgctttg acaagggatt agagagattc gtgaagacca tgttaaagac  
26161 tgaacacggc tttttaaagg gccgacacgg tgggcttaag tcaagacgcc gagatgtatc  
26221 tgtataaggc ttcatatgtg tatttgttgt tttgttttta ctgttgtttg attttttagca  
26281 gtaggcactt ttttgccctt ttcaccaaag cctccaagtt taaaaacaaa cagtcaaatg  
26341 gtagaacaag gagggacagg ttgaaataaa caaacacagt ttgttctaca aatgggtgtt  
26401 tttaaattca cactacaaaa tgcgttaatc acgatgaaat taaagattgc ctataggcag  
26461 ctttaatcgt gcttctccgg ggttatctta ttgctaaaga gagtaaaaat aaattatggt  
26521 taaataatta aaaaactcac ttatcaatag gcctttgata ttttaggaag aaaacttcca  
26581 tccatacatt cttggtaagg gatccttgaa ctaatatagt taaaaaata tttttaaggt  
26641 atatattttc ctccaactgc tctatagtac ctacataatt aaattccctt acaaacagaa  
26701 attaacattt cgtagataaa aatgaatgtc ttcattgatg tgtattttaa ctcagtgggt  
26761 agaagtatga agaaaaacat ttgaaattgt cagcagattt tctgttttat taaaggagaa  
26821 agtctaattt agcaatatag ggtcactct ttatagttta tgaaaatatg tcagtgtatt  
26881 tctgcaaagg taagccaaaa taccattacg acaatatgat gaggcacaag acaaaaaaga  
26941 aaatgtatcc acaacaatg ctaaaatctg gtgacctgag atctctcagg actcatacag  
27001 tagacagaaa tgactcccac aagttgtctt ctgacctcca cgtgtcacac acacacacac  
27061 acaagcacat tcacacgcac acacacacac acacacacac acacacacac aagcacacac  
27121 acacaagcac attcacacac acatgcatac aaacaataaa atgtaaacat tttaaattct  
27181 aaaagcaatc tagtaaaaaa attggacaaa aggctctcag gcataggctg aatcatcatt  
27241 aagagtaaac taaaagtctg ggttgtgatt gaagaccagt ctctgaatgt tgccatgggc  
27301 gaagcctgtg aaaggcaaca gatcagaggc acactgagga gcacacttga tgagacatgg  
27361 taaagtcctt attgatcccc tgagacagcc agcctcccaa tcatcctcag actcctcgtt  
27421 gagtgggtat caacctcatg tgatttacag aataagggga cattatgagg agaataatat

27481 tcaaggtgga tttttgctcc acctctgtga gattctgttg taatctaaag tgctagcctg  
27541 ggcacatgatgg tatacaacct taatcctagc attcaggaga cagaaacagg cagatctctt  
27601 tgagtttgag gacagactgg tctacatagt gaggtccagg ccagggcaat aaaaagagat  
27661 cctgtctcaa acaaacagct caaacaacaa acaaaccaa acaaaataac caaacaaaa  
27721 caaacagaca aaaatcgaaa caaaaaaac aaccacagct aatagctgcc tcctctgata  
27781 catgataatt agctatttgg ctgagcaata actgtccctg aaactgtaaa ttcgatagcc  
27841 acttaatcca agaagccaaa tctctcagca gtccccacct aagcactgat agcgtggaac  
27901 tccccagagt cactggtaat gagttccatt aggaggccaa agaagggaga gtcttatgtc  
27961 catggctgat ctcagcagaa tgctcactgc ttttccctca gacctctttc tagctagaat  
28021 tccttttgga agacacttcc tactttgaga gtaggtcttt cttcctcagt tgaccctctc  
28081 agggagcacc attatagtca ctccgggtga tgtgtcccct gggtaatttt aaatctcatt  
28141 gagtatcaac agattctcat atgtgccact agtaatatga agctaagaga tgaattcaaa  
28201 gaagatttag ggacctgtta cttcagtgag cctgctgata tttcctccaa cataaaggaa  
28261 aaactgctga tatttaaac tctcatcctg tagaagaaaa cccagcatgt gctaggttat  
28321 ttggggcttc aaagccaaca cattctatgt ctgtagtcca catgctaggt ggaaggcaag  
28381 gcttttggtg acaaaaaaat ggggaatggg ctttgctata ggtctcagt caatgagcac  
28441 taagcttagg caatacagcc acagaagtta atgatgcaa cattaatgat gaggagagac  
28501 agtgtgatac tgttggaata ccatgcatca tcagcaccag gtccctgtaga aaaggattcc  
28561 cttgccctag gataagaaca tgccatgcat ttcgatgttc tactgtatgt taagccatat  
28621 tggccccact gaaccatagt tagaaagagc tagaggccat ttgcaatata gaaattgtga  
28681 tcggaatcaa agagagcttg agtaacttgc acaagcaagt agcccaggag cccagtgctca  
28741 ctcaacagaa tttcaccagt gcctctacc catgcttgta cacatgggtca tgggtggggg  
28801 tagggaaatt tctgtatgac cagcagaaag gacagaaaaa acaccagtgc ttggtgtaaa  
28861 tataggctgg ctcagttcat gggagaaagt tagacatgga tgacagccac atgttaaagc  
28921 cgtcttctgg actttgaaag acagtatata gaaaaaaatc ttttcataga tcagagattt  
28981 gggctgtaca acctgccatc cacaacata aacctatggg ggcaattcca cattcaagcc  
29041 actttgagtg agctgagaaa gggccaggag ttcacgtgcc tatggccagc ctacttctag  
29101 ctctgtttct gcagtagcta ccaccctta cctttcagtc tgtctcttca gaatagctac  
29161 aagagctgtg ttgctcaaac acagaagtca ccagaatgca cagcaggaag gtccaaatcc  
29221 ttatcatggc ctgtattcct agattatttg actttgacct caagtgtttg ttacattttt  
29281 ccttggtgtg atgaaacact tgaacaaagc aaccgagga caggtttatt ttagctcctg  
29341 gttgaagaga cacagtctct ccccatgagg ggaaggttg tagaagtgtg aggtgactgc  
29401 ttcacatggc ctaaagtcag gacgcaaaga gtgggtctag ctatccaaac tcatggccag  
29461 cttcaatacc taccaccgcc agagcctctc ctgctcctga agtttctaca accttccaaa  
29521 acagcaccag cagctggtga ccaagtgttt gaacacatga ccctctgggg gaacatctca  
29581 caactgaacc aggtcctcta tggctttatc cctgagtgac ctttacgacc cactcaagt  
29641 tgcaagggtc tgctcatttt tacacacaac cagtcactga gcctctgaag caactgttga  
29701 gaacattgac ctttcatgca cacatcctga agatccacc tttcattaag gtcattctc  
29761 tgactgactg atttttcaat taacttttta atctgtgaga gccgtatgct ccttgaggcc  
29821 taaggtcaat atcaatgtga aaagctacag cctggaagag caataatagc aaaaataata  
29881 aaatgcacct gctattcctc atcagtgaca gaattaaaat aagaaaagaa tgatcttttt  
29941 ctttttacag tttagtggat aaaatgtata aatatcaaga atttgattgt tgacttttta  
30001 aacttaaaga tgattaaaat acttattcct gtgagtacga gcatttggct gcatatatgt  
30061 gtatgcacca tgtgcatatc tgggtgcctat agagggcaga agagacctag aactggaggc  
30121 tcacagactg ttgtgaacca caatttgggt gctgtgagcc taaggtaggt cctctgcaaa  
30181 agcagcagat gctcagaacc acccagtcac ctctccagaa taacactctc ctctcagaa  
30241 ccaccagtc agtcacctct ccagaacaac actgtcctcc tcagaaccac ccagtcagtc  
30301 acctctccag aacaacactc tctcctcag aaccaccag tcagtcacct ctccagaaca  
30361 acactgtcct cctcagaacc acccagtcag tcacctctct agaacaacac tctcctcctc  
30421 agaaccacc agtcagtcac ctctccagaa caactgtc ctctcagaa ccaccagtc  
30481 agtcacctct ccagaacaac actgtcctcc tcagaaccac ccagtcagtc acctctccag  
30541 aacaacactc tctcctcag aaccaccag tcagtcacct ctccagaaca acactctcct  
30601 cctcagaacc acccagtcac tcacctctcc agaacaacac tctcctcctc agaaccacca  
30661 agtcagtcac ctctccagaa caactgtc ctctcagaa ccaccagtc agtcacctct  
30721 ccagaacaac actgtcctcc tcagaaccac ccagtcagtc acctctccag aacaacactc  
30781 tctcctcag aaccaccag tcagtcacct ctccagagca acactctcct cctcatagtt  
30841 tttttgaaga tagggtctct ctatgtaacc ctggttctc agacactcac tatgcaaac

30901 aggctaacct ccacatttaa cctctccagc attcatctgc ctcttaattg ctgggattaa  
30961 tgcttgactt tattcaacaa cttttggggg tgggggaggt ggggctcgag accagatttc  
31021 tctgtatagc cctggctgtc ctggcactca ctctgtagac taggctggcc tcgaactcag  
31081 aaatccgcct gcctctgcct cccaagtgtc gggattaaag gtgtgtgcca ccaccgccg  
31141 gcattcaaca acttttaaca gttatatttg caatgtttaa gaggccaagc cgtggttttg  
31201 aatctggtta ctttttcatt tgtacttacg tactttgaag ttgttactag atacataggt  
31261 tatttctctt ggtaaactga cctgttcate tgacatatga ggactgagct cagtgccttg  
31321 tgcaaggcaa gcacagagca ggacaaccct taaccctttc acttttataat aagttacttg  
31381 ggttcgtggt ctgtcatttc agctgaagga ctcaactgtac tgtttgctac tttgctttac  
31441 ctctatggga ttgccagttt catctttatc tctgaggaat tttttttttt ctatcaaaaa  
31501 tggaactttc aaggagagat ttttttttct ttcagaactt gaaatatctc agacaaggct  
31561 gcagagatgg cacaattcat gaagtgttta ctgcacaagt gtgaggttat aattttgaat  
31621 cccagagct catgtgaagc tgggcagggt agtgtgtaat ccatagtgtc cctaaggtaa  
31681 gataggaagc agagacagaa gaaacctggt taagctcaca ggtcagataa cctggcatag  
31741 agaataacaa aacagaaaaa gcaagattgt ccagtgcact gcaaccactt ccacataagc  
31801 acatgtatac agaggttttg aggggtaggg gctgtagggg gaaggctctca gccactgcc  
31861 ttctcccact gcagttcctc ttctttcttt acattgttta caattgttgt cctattataa  
31921 atagggtttg ttgctagttc cacaactatg ttttggggtc tttctattat tattattttt  
31981 tatttacttt gttgtggctt ttttgtcttt aagattttaa aatgctgtat tcctttaggt  
32041 attgcttttg tgttctgaca gttaatgctt ggagttagtg aagtctttgt gaggctcacg  
32101 tttttggatc attaggaaca gtgtatcgac tgttatcagc agcctaattt aactgttcac  
32161 ctgacactct tctgagatgt ctacttgggt tgctatgtag gctgaggact ttctgttgc  
32221 tctcagggtc gaaatttctt ctctcagga cctccagaat tttcattctt tcttggtttc  
32281 agtgattctc tccgagtctc ccaaaggttc ttttcacata tagctggatt agttcttggc  
32341 ccaaagctgg agccctcagc taggatgggc tcctttgtct tacagattct agctaacttg  
32401 gtctctttga tctcttctat ctgttcaaac agtcagggga aactcagggg gtctctgaag  
32461 atctgctact ctgtacctca agtggaact gccttaggtg acaacctaaag gcagtgatag  
32521 tctcacaccc caaacacagc ccctttcttt cccgaatacc agctgcttga agaacctgg  
32581 attccatagt tctgttacet tctggatttc ccaactgtcc cagaagcaga aatatTTTTT  
32641 ttttgtaaga tacaactttt aaagtagaaa agtaagatgg aaaagctgat caaatTTatg  
32701 ttggggacat tggtaactca tagttataga attaaaaaaa tatatacaaa cacttttacag  
32761 atgaaaagta taagatatca gtgaggacat agtgatgcca aatattacca taaagcggcc  
32821 agatatgcat agagaggatt aggaaatgta ggcattcaac taagactctt cctaaattac  
32881 atgcaaggag aaaaaaatgt gagcctaac ttcaaagggg caaaactgat gtcttctctg  
32941 gaccacagc cacaggcaa gcaagacaa aggaaaagaa gattacagac ttttcaaatg  
33001 gataaagggt agcatatagg tttgggttaa gctcaacctg cttttgtagt aaagaggcac  
33061 ccagtgccca gtaggcagg acagagccc aactgaatga gaaagagagg ctgggctgcc  
33121 atagcaacat aactggcctc acttctctct gcagaagaaa aaaataaata tccggactcc  
33181 tgctactgat gccagtggct tctcttcttc ctcttctcc tcctctgact ttctgatttt  
33241 atgaaagcag agcatcaacc tgatataaca atgagactct cccaaatgac aaactttatc  
33301 ataagaggca gattcttaaa ggctggagag acggctcaga ggccaggcac tatggctctt  
33361 gcagaggaga tgggtttgcc tctcagcact gacttgggtga ctggatgggt actgaagact  
33421 attacctcct gttccaggag acctgatgcc ctctccagc ctctgatggt acttgagta  
33481 tatatgtcac acagacacaa attcaggcaa ataaaaaaa acatgtttca aaagcaacct  
33541 tagatgaagc aattaactag tggaaagacat acattctcag gatataatag cacacatcaa  
33601 attgtgtagc acttaagtgg caaattctgc ttcagaacag aagtatacag tctgaataaa  
33661 aacatgacat tttgatgtt tttttttcca acaagaaagt gttgcaagt tttggcatgg  
33721 ttcattaata acttggctac atttgtgtga gaatgagtga cacagaatga tggtttttag  
33781 atttgaggg tagtaagaaa cctcttgagg atatctttct attagtgggt gttggactct  
33841 catgagcaaa gtcacacat cacccccaca ttctggagac tgtctccagt tcctccagac  
33901 actgagacca agtatccata gatatttact ttaaactgg ttttccgta tttccaacct  
33961 ttgtctaaaa aatggcattt tctaattaag agattttgaa gatgatccag ttctgtttgc  
34021 ttcatatcac attgcaactt taactttttg taaacttacc tctgcctttt ccacattacc  
34081 ttccaacttt attcccgtgg ggcaaagtgt tcacgtttac ctcaatcctc tttactgact  
34141 ttaataggct gtaaaattgt ttaagaggaa cctcaaaaga ttgcctcagg attcacctgg  
34201 tcctcaagtc ctggagtct ttgaggggagc aaatgtactt ggtaagataa acaatcagaa  
34261 atcatgcttc cccttctcct aaaggtgggt acggttctc ccatagttaa aattgaccac

34321 cctgggcaca ctgtcctaag gcctctctgt actgagtttt acagagaagc ctttctagtg  
34381 gaggggtggc ttttaggaaa ccagactcaa acctgagctc tttcactgtg gtgcctaagc  
34441 aataagacac ttattgctgg tctcagtctc ctcatTTTTa acacggcaaa aaaggatacc  
34501 tcttcaagga ccaggaagac ttaataagat catgtctggc atgtgtcggc tcctgtttaa  
34561 taagtcatta caaatccgag aaccctatcc ttttaagagga gtgtgcaagg gaccattgca  
34621 agagctaagg ccggcagagc taaagctaag ctttaggcag aggaatggga tatgtgcttt  
34681 tagtgttggt tactcttgac ttgtttttct ctatcttatt gtacaagtct gttctgagaa  
34741 tttgcatcaa ctttaaaatc accatattaa ctcttccacc cttgaagagt gtcccaccaa  
34801 aacaactgta ggcaccagag ccttgggtggc cagaccagag taaagggagg cgtgtctatg  
34861 acccagaagt cagcttgaga caagcacaat tgctgcgtct tcctaatttt cctccaagag  
34921 ttatccaagg ggactgtggt tttgccttaa gcaaaacccc tttaacatcc cagcatctca  
34981 aagcaaaaaa cattatttta ttaggtacc cagcagatga aagcaagtgt tccatttggga  
35041 ctcttctcag gcaattaatg cattagctaa agacaaacct tcctgaaaaa tcaaaccact  
35101 gttctcagca gcctccgatg gatttgggga acagagagca agcttcaaat gtgtagtcac  
35161 tgataagaga aatgattccc aactcacctc aagcctaaag taacattcca catgaaggag  
35221 aagatttttt ttaaaacaac agtttaattt ttcacaatga ccaggaatt taaattcatc  
35281 cttgagctca tgtcattctt cgtggctcac agaacaat tattaataat taaaacctat  
35341 tttacagcta tgttgattta atagaagatt gacttgtgat ttctttttaa aaaaagtgtt  
35401 tgatactcgg gactgtatca attgtccctc atttctggtt ttaatgccag cagcagaaag  
35461 gccctatcag ggacagtgtg gaagtcagtc tgatagcaca gcctgtgtcc tcagcctgat  
35521 gtcacaagac tgtatttcca ggtatttggg cgattgagag gggatatatta acagtttcag  
35581 cgtgtttgag caacttgtaa aggccatgat tcaaaatttt aaaaaagaga aaagggctgg  
35641 agttacaact cagtaataata acatttttat ccaaggccag agggtttaat tatttagtat  
35701 cataaaaaacc accaaaatat aagagacatg gtggaggaaa aagcatttat taaaaattca  
35761 cccattcaac tgttccttca tgcatacctc agaatgataa cttcaaatgt ccgtggctca  
35821 gaatggcctt tcccttacag aaagccctgt ttaggtttca agggagaggc tgccactgtt  
35881 gagaaacaca cacacgagga tgttggtagg tatccgagac aggaagaagc aggcaattct  
35941 gtcagtacat tttgtcttaa taccaaaggc tgaacctttg ggagaaaact gtgtcccatc  
36001 tgcctcccct cccccaggta agacaaaagg cacacacgcc tttgtggaag acgctcgtgg  
36061 aaagaacatt ttagaaagct ctggaaaaat ccacatcctg aaagcatttg attaccaga  
36121 attgaaaatg ggattttagt cagtggcaag agtacaaatt catgcctaca agtctggcct  
36181 ctgcggtcag aggcacacga ggggttggag ggaaggttaa tttggaaggc agataaactg  
36241 gagcctaaga cagattcaac aaatattatc actgaagtgc cccatcctt gcacctgaag  
36301 cgtcccagca tgcctgcat tctgaataca cagtctgagg aggctacaaa cagtttcaag  
36361 cgcaatttgt tcctcgtttt ttattccctg cacaccgagt tatgtgccgc taaacatttc  
36421 cagaagactg tcaaaacgta agcgtcccga ggtttacaca ggccacacca ttaaataaca  
36481 tataagcaca aagatttaa cattgttttc cagcaatgct aaatattttc gctaagtaa  
36541 aactgaagct tgaatgcaa taagcattta aacgactctt ttctctgggc cagaattctt  
36601 acttttccct gtgcgaccct ggctgctggg attaaggcga cccagggag ctccgcaaat  
36661 ggttgtgggt tatgaggtgc agcaggggct tggcgacagc gcgccacca gcttcaagaa  
36721 acccagccac gactggaacc caagaaccag tgtgttccact ctgtggtcag cttcgcattt  
36781 tctcttctcc ctggaaaaaa attaaaagg ctgctacgaa aagcaggcct gtctccccg  
36841 cctccaagc aatcactggc tgagccaagc acagagctgc agggctccag ggctctacac  
36901 ttgggaaggc atggaagcac acaggggca catgcctact gggcctttcc cttaaagagg  
36961 gacaccgtcc aggaacttac tgtagcaatg acaggagcca cgccgctcca aacatactgt  
37021 gctgtcactc tggggagaag aaaaaccag acaaatttc acgtggttct taccgcatgg  
37081 tgattgcagg ccaattctag gcctgttaca ggcattgccac cactgagca gaagtcattg  
37141 aaattaggcc tccttcaaag gctctcaagt cactgcctcc tgagcagaaa aagtcaagga  
37201 tttcaaagaa acagggacag tgtgatccta tctcctactg gctcttgggc ctctgtggc  
37261 ttcttcttct tcctcttccct ctccccctcc tcccccttct tgtttctcat cegtctctc  
37321 attcattcat tcatttatat attcacttta catcccagta tgaacctccc tccttccca  
37381 ttgtggaatc accctcagtc ccaggcagaa ccaagatggt cccccatcaa aaccaacagt  
37441 tcataaaggg atgggtggac tatgtgcttt tgatgagatc tgggcccagt ggtttttttt  
37501 tttttaatca aaatctgatc ttttataaaa tttccaacaa gtgtcaaaag ggagtatgag  
37561 aactcgggct cccaagccca aagctgggac actgcatttt ataccatcct caaactgata  
37621 cctggctctc gaggttgcta tgtagtaaat accacgtttg tcccatttct ggtaaagatc  
37681 cacacctta acaggcgtgc agatcaaaaa ctctgtgggtg atgctgaaga tttccagctt

37741 taatttaact gcagggacag ggatggaac cttcagggac taagaacact cacaaaccct  
37801 agtaaactca tcagcatcac ctttgggtaa tgagtgctgt tgacagtaat cacaaacttg  
37861 taagatttgc ttcttttccc aagtcacac aatgaggcga aactaaciaa gggttggata  
37921 cagcgaatt tgcttctggg atagcccagt agtaacttac attacaggta tcatagcaca  
37981 gatcttatgg ccaacttcca ctgtagcttt atgttacttt actcatcgtg agaagaaact  
38041 gtagcaagtt gggctgggga gatggccctg tcaatacggg gtccactgtg caagtttggg  
38101 ccctgagttt ggatccaaca ctcacataga aatccagggc agaggcactc acatgttact  
38161 caagaacagg cagtatgctt gggataaggc acaggtggat ctctggagct cattgggtcag  
38221 ttaggtcacc aaacttacia gctttaattc cactagagcc tctcagtaat taaaatggca  
38281 agagcaagga agccatccag tgctaaagcc tggtttccat acatacatgc atacatgtgc  
38341 actcttacc aagcacttac agataaatct actccccat gagcacacat gcttcccaaa  
38401 cacacaaatt gtcttaagta ttaaagatgt ttaggggtgag ctggagagat ggctcagagt  
38461 gttaagagca ctgactgttc ttccagaagt cctgagttca attcccagca actacatggt  
38521 ggctcacaac catctgtact gtgatttgat gccttctttt ggtggctgga gagatggctc  
38581 agcagttaag aacactaact gttctttcag aggtcctgag ttcaattctc atcacaacca  
38641 tctgtaattg gatctgatgc cctctgtgta tgtgtctgaa gacagataca gtgtactcat  
38701 ataaataaaa taaataaatc ttaaaaaaca acaacaaaat gatggttcgg gtgagtgtat  
38761 ctgtccagta gttctttctt tactcagagt gatgagatat atgttcccct actcattctg  
38821 agacaggaaa aggagcccat gcattactcc gaaagccagc ttcaatggga acacaatgtc  
38881 cccaaacatg gcatgaagag ttgtcagagt ccactaatga caatattttt gacatttatc  
38941 atggaaacac acaagagcaa gcaatcaata gcttataaaa tagtttattt ttcccttcac  
39001 aaacacacia gcctctgacc atgatacaag gcacccaaa tcaattataa acttagagca  
39061 tatctgtctg acatgattca agagaaagtt gatttttaag gcaaaagggt gccaaccatg  
39121 gggactcgag gagggtggta ccagcaaaaa ggggtgtctg ttattcttac agtgtctgtt  
39181 aaaattggaa tcagcatgtg ttcatcatat acatatttat ttcaaatcag tacaccaggg  
39241 agcagaattg tgtttcttct gtctctataa taaaacggcc caaagcactt ccttagcatt  
39301 cgagactttt ccctagtaga cttgctatag caagagaata tgattgctaa acatcctgaa  
39361 tgtgggtttc attatgaaaa aacatgtttc acataaaacc ttcataatat aatccagagg  
39421 ccaaatttgt gcatgtttaa aatttgagtc caggctagat atttgggttt tttttctt  
39481 tccagtgttt ttcattttta taaatatata ctttgctttc tactacttta aacatactca  
39541 gaagtctttt ggaaaccatg gccgcctttc agtagcatta gtgagaccat catccaggta  
39601 ggagacctcc ttaatttccc ttcagactta ctccacatca agttagtatt gaccaaatcc  
39661 cagtatttaa aagatacaaa cacaggttgt gggcaaagtg ccaaaggata attaggaata  
39721 attccccatg atcttgctac aaaaacatcc agaaaaatga atgattgcat ttaatatagg  
39781 aagcattgac ctgaatttaa atgggacaga tgtggaaggg acggagccag gcctcagacc  
39841 cagatgaggc ttattgtggg tccaatcatt ttacaggcac atccagggtca gtcactctag  
39901 gagtcccag cagtcacttt tgaggtagat gctgatggct taaagagagg taggtaaagt  
39961 ccaaatttgt tctcaatccc tgcgaatgtg gcaacggcca gtttgtagcc ccctacgtgg  
40021 tcaggattgg gagcgggag agtaatccgg gatttaggaa cgggctcaga tcccacgggc  
40081 ttctatgaa gagaataaag ggagtgtcaa gtgactttaa aaaataccag tagacaccaa  
40141 tacaaccatg caacatggag cagtactga attctagtca atgggtgtgct ccctgggaaa  
40201 cgacctgtg gagctgtgca caggaggcag tcagcccct gcacttctca atgagaactg  
40261 agtattagag gctgtggaca tttagcagt aattcgccat gacacttaca cgcctccaaa  
40321 atcgacatag aaccaccgct gcagcaattc atacgtaagc aaggtgacac caaactgggg  
40381 cgaggagcgg aagacacgag ctacgaccaa ggggggaata acagacacca ttagagtctt  
40441 aagaaatttc cctgatacca aagattagtt aagaaccaat tacttccgta ccagcaactc  
40501 ctttccacia tgctttgggg ccctcttctc gaagtatctt tctgaagcag tcggtcacac  
40561 cgttgtaagt ggtttggcca gcccgggcag ccactgtaa tctagtcttg ataacatcag  
40621 caggggtcac taaagatgcc gcaggcatac ctggagccga gacacgatac catgtcagtc  
40681 cactcacatt ctactatat aaaaataact gtgctttgaa ctgctggccg tggaaagaaa  
40741 gttaagcagc cagtgaata aatgcctat tttgctgtcc tctggagagc acaacgtgac  
40801 agtactgtct gcagcgacca acccccctgc cccgaacctt catttggtgt ttctattctt  
40861 aaatacacia atatttctaa gcaattatth atccgtaaca ctatttcaag tgggtgagaa  
40921 caaacagaga aagtggtttt caaaaaatth tttatttttt attttatttt tatttttttg  
40981 ctttctgtt gaaatcagaa cctcatgaag ttattagggtc tgatttttca gaggcgaagc  
41041 ttattatgtg tttctcttc atggtttcct ggctgctggc agccacagga cgctgcttcc  
41101 cctcacacat ccagctaccc tgcacaacia aaccccaact tctctacca gaaggctgta

41161 ctgatcgcta agcaaacacc aggagcctgt ttgtgactcc acacacacag tccccccca  
41221 cccccaaatc gatacatcta gaaaacttta aaacagaaag cttaaaatth atactggctg  
41281 gtaaatagata aagaacaata acaacaacia acaacaacac aaatccctcc caacaagtcc  
41341 ctcccaaaat tacctacagt aaattatthtt tacagtcgct ttttatccaa aaatggggca  
41401 gcccaagttg agagttthtaa aatggagacc attcagaaga cactgtctct tacggthtta  
41461 ttactthttcc actatgaacc tattccaac caaactggtc agatgcagat gcataaatct  
41521 cthttgcttht thttaaggct taataattht gtaagaatth ctgtccaaac caacatggtc  
41581 tggcttagaa ctccatctca tcttcaaca gacagthtta aagtcacatt gcaagtgagt  
41641 gtgtgtggag ggggagggtg taactgtgaa ctacacgctc ccattthctac tggagagaa  
41701 gcgagtgtct ctctgccttc catctccact caactcctct aacactaatt cttaggcata  
41761 gtcattacc aaacactgcc thttacatat gcaaagctca ctctctatcc agtgthctc  
41821 taagaagcag catcgggctc ctattagctt ggagggatta ctgtaattht gagccaggaa  
41881 thtatcttht cacatgacga aaggaaacac gatgcttaga aaccactgt tcacactggc  
41941 cattthgctt cactccctgg thtaagaga atttagcagg gagtctctc tagacatgaa  
42001 atgaagtagt cctaaccacg ctgcagatgc gatcatgtgg tgctgtgaaa gacacagggg  
42061 taataacgaa ggacacattg thttcccacg aaggtatgtt tcatacacia thctgtgca  
42121 tgaataatgc tggaggagag catgaagaat acatgcaacg agaatacaaa tgtctgaaatg  
42181 aaatgctgaa aggaaacaca taaactactt aacaagatga ctggcaaagc agattgatgt  
42241 atgtgtgtgt gttggggcg tgtgctagaa atcctataac tcaaacacia gccagccat  
42301 ctctgtctgta gccccacac cctcaaatgg atgacgtcta ggctctcaga actgthtacag  
42361 acatgthtg tagactthctg aggggcatgt gtagtgggga ggggggthga cactaaactt  
42421 ggaaaactga gthctagctac tctaaaagth ggctagthca gthcaaatgtt ccacaaaggg  
42481 ctggthctc tgacagctac tggthttcca gthctcagtg gacaaagatt atgaaatcaat  
42541 ttgccaggtc attctctgcc thtatgccaca thgatgaaac agctthgagt tggagagaa  
42601 agagaccaga cgataggaag ggattgtcta tgtgtcctca caggagaggg gggggcatcc  
42661 tgctthgatta attatggaca agactctgtc atatgtagcc ctgggggcta cccatagcct  
42721 cagcaacaga aatgacatga ggtgctcaga ggctaaataa aacaactgtg ggactthctag  
42781 ggagccagcg agtacagacg atcactgaca gcaggagaa aacaaaacct gactgggtga  
42841 atccagacag cthttggggac aaagacatta atthtataag thctatatta ggattaataa  
42901 cthttgtgtht thctccattht aggctthaaag gthttgtaca thttattht aggtcaaagt  
42961 taaggcttht cacattacac thttaaagta thtagctatat gatcaacctc ctaggthgac  
43021 gactgacagc aatgtgataa agthatttht taagaaggag gaaatcagc cgggagtgaa  
43081 cagthgactc ctataatccc agcactcagg agthaggcag atctctgagt tcaaggagag  
43141 thtgccctac aaagtgagth ctagaacatc cagggctaca ccgagaaacc ctgtctthaa  
43201 aaacaaaag gaaaaaaa aaaaaaaa aaaaaagga gaaaaatctc ccgctgccta  
43261 ccctctctc tagagctgaa ctgaaagcct cgatcttcac tgcatgcatt thctgtgact  
43321 gtggctactg gactctthc thcatgctctg thgatgtht thgtctctc actthcagth  
43381 thgatctccat thctccacta gataaataca cattgccgtg acatagctgt ggcatgthg  
43441 thctgtccac atgggtgca ctctaatatg ctcacacccc cthttctthc thctacgcagt  
43501 cthctthgac agthagthtg aacatcagcg thcagagaca thgtgthattg thcccagctt  
43561 thctagccca aactthtctc thgtthaaagth gthctcaagth thccatgtgt cthctthaca  
43621 thcactcctg atctggctgc thgagagthga accctcgcaa gcagagcaga thcaggctct  
43681 gthctcccct tggatgctac atcaatgtgg gccacacctc atgtcctggg caagtgggag  
43741 thacggthact gthgcaact agaagcccat cthttactaa thggthtctg thctthtatcc  
43801 thattctcac atcaagthaa thctththaa acagacagth cacctatgtt ctatgccct  
43861 thcagthctga thttthctc thctgtattht thtgccatat thtaggggtt aatctthacc  
43921 atgtcttht thcttaagg thctthtctc thttctctga thttthactt aacacagtht  
43981 thgagcagtc ctcaaacctc thattctctt gcctthagctt thctgagtht gggatthagg  
44041 gcaagcaca thgaaatag cctagctthg thttctthg thcatgtctg thttatcatt  
44101 agaaccatag agatththta thttcaaat catttcatta thtaaaaaac aaaaaacta  
44161 ctcaaacctc cthttgthct caaagthtag cctcagthct thtaatgaga aactgtctta  
44221 agataatcaa gthaatcatt cattcgacct thgggtccat cthcaataaa acacataaaa  
44281 thaatththaa atgcccagaa actctgacat gthgttacat thcaatthtct gagththact  
44341 thgtccgata gthtatgagth atacattccc agaagagthg thgaaagatt actatattgt  
44401 thttthacaact thctgtggac thactththt ththagaataa aaagthagat aaaacgaa  
44461 ccctthtcaa gthttcaatt acagthctth caagthctcc thgtggctcc aatthaccgt  
44521 thttctctgta atthttcagth thcatgccc thgtgcccct thctgtctga gcatggctgg

44581 ctgtctactg atactcggga tcaaataaaa ggctgtccat gcaatgcact cagccctggg  
44641 tggcatctgc cacactccag acaaacttcc ccaccacttc cccttttggg tgggcaagcg  
44701 ctctatcctg aaagggctaa ggcaggctac agggctgagc tttccagaat tctggcgtgt  
44761 agaaagccag ctgaactgtg cagtgagaat acttcatttt ccactccact gaggaaaagc  
44821 tgtaaattta tgttttgccg cacctgtggt taaggtctga catgagccta agccctgtcc  
44881 tgcttcctct cagttctaca tgagccgta tccggccaat ggcccattct ctacgttaca  
44941 gttctcagtt ttatcttgca gacaaatggt gctttaagct ttaggtggca cggggagtgg  
45001 ccaggctggc tatgtgtcca gaaaggcagc ttcttgcttt tagaatacat tcttctgttt  
45061 actcggaggt caagagtctt cgcttacact ttacacaatc aatagttttt tcctgcctgt  
45121 tctggcctat gacatcacca atttcagatg taaggtgggt gctttctgag tacggatgct  
45181 gtcgtatttt ctagcagttt aagacatttg ggaagaaagt tatatgagtg tgtgcacttc  
45241 actaccagc cctggtgcac tactttatat tctcaaggca ccaagaattg aattatthaa  
45301 atatcaaadc ttctgtgcca gcagctcttc cctcccagga gtttgaaaca gacctcaagc  
45361 catagacacc ccccaaaaaa tgctcctgac ccacaccca aacatacag taagtatgtg  
45421 ttctaagctg aaaagttctg agttactaat acagacacc caggtacaat ggctagatth  
45481 atgtcaactt gacatgagcc atagtcatct gagaagagga aacttcagct tagaaaatgc  
45541 ccccataaca tgtgaacata ggcaagcctg tggcgacatt ttcttaatta atgattgatg  
45601 gacaaaggct ccgccactg tggacgggtg catccctagg ctgggtggctc tggattctat  
45661 aagacagcag gctgagcaag ccaataagcc gcaccctcc acagcctctg ctccagcttc  
45721 tgcctccagg ttctgcatc gtttaagttc ctaacctgac atccttcagg gatgaaaagt  
45781 gatgtggaag ggtaagccag atctcatggt tcctctctag ctgctttagg ttgagggtgt  
45841 tcagcacagc aggtaagtgc acagggaca ggatggctgt ggggctaadc ggcagcacag  
45901 aggtggcaat gacccagga cctcaagact aatgtgggtt catgtaaaaa acaatcagtc  
45961 aatcaaaaaa aaaccattca tactttctac cagcaacctt agttccaaga atctatthct  
46021 caaaaaggc gatcaaatcc aaaatagaaa agtgtttaag cctaaagatt tgcttgatth  
46081 aataacatca thtatataaa agthtcagta atthggacag thctaagat thgtgathag  
46141 aggtatatga ctctatctct thattgaath ctatththaa accctggatt thctctcatca  
46201 ththcatcag cattatgtht gtgtthctct gggcatcact caggcactth atagatcata  
46261 aaaatgtagg acatatacac aataggtgta atggcatta gthgthgtcc acgtgactca  
46321 tctggaatga actacaathc agaaatggag ggaacacctg agagagatht ththththaac  
46381 taagththga thgggtgath ccactthcag ththggcctt gaggtaggaa gacacacath  
46441 ththgathcag atctthgagc thggaagacac acctththth thggccacac thctctgctth  
46501 ctctthacct cttagcacata cattcgctca thcagcatcag agccactth ththgggttc  
46561 tagcatathc thgaaggccag ctgaggcath thcattgtg gactgagcaa thctctgath  
46621 cacagccaga cattgththg thtagctgath thgggtgta thgcatthca athaatthct  
46681 thththctatc thctatctca thctatctatc thctatctca thctatctatc thctatctca  
46741 ctatctagag atthcathata thagthctth thctctagac aactctgact athacaathg  
46801 aataactactc agctacaaag aaagaaatgg tactataaaa atctaggaaa gaathgacath  
46861 atthgathgag thatcccagg aaaagagag caaaththac atgththctc thctctgath  
46921 thcttaggtc caaathctct gaagagagta ththththact aggaaagtha agagggacgc  
46981 thgathgthgata atgthggag gctththacta gaggggagag agathaacac caaagagcg  
47041 aggagagtha gathaatgag ggtatctgaa aagathataa agagctgthc thththctat  
47101 atactgaaaa ctacctataa catatacaag thctgtgaca catatccata aagagththg  
47161 atgaaaatht cccatctggg cthaatgathc catcccaag aaccataagc thctthataa  
47221 gaaccthata acacaaggca thgaaacacc acctththgag thctgthctg thththctaa  
47281 gagagthcca aaacathata ggctactgth gthgthctth gthgthctc agaggagaaa  
47341 gagtaagtht ctatgcctga agacaccath cactthcagac atagaaacca caggatcgaa  
47401 gcagcagath gactthaaaag cctthctctc thggtatcath thctatggta ccagathgca  
47461 gthththcaaa ggaggggaga aaccaaagth cthaccacac thththgagc thgathaccg  
47521 actggtacga cathaatagcc cthaaagthg agthaatggca cacathctt gthgththaac  
47581 acaathththc thaatggaca aaaggctgth thcaacaagaa athagathcat gcctthctgct  
47641 ggathacctg cthactthct aagactagth aagthcatgath thctggagga aaacctacac  
47701 thgctthaac thththththc gthathththc thththctac agacagctgth agthctgac  
47761 cctcatcaag gaathctthc thththcaaca agacctctac agaaaaccac aactgathca  
47821 aatgacagath gatggathct agthcccaact gaacathctac aatccagtht ctgththctaa  
47881 ggctcagga cactcgtgga agaggggag athagathgth ggagccaagth gaacathaaag  
47941 ththgctthca tactgtgthc cctthgagthc thththaacag gthgthctth acgggaaacta

48001 aacaaggatg acatcaatag tcttgctaac atagactcct aaggaatgct caaagtagga  
48061 aaaatagtct tccctcaaaa agaacacacc aattgattat ccaataccaa atgggtcaact  
48121 ctgaaaacat acacataata aacatcatat agactgagca ggttgaattt atatatgtag  
48181 aaaacacact gatgtaacaa gccattagag aaaaaagagg catctgtttg aaaaggaagg  
48241 ggtgacaaca cagacttagg aaggactgtg gagagaaaag ggaataata taattatatt  
48301 ataatctcaa aaagtataaa gaaaaatata gttgaatatt tctgaatact gacataatgt  
48361 caactacttt aaatctttgt ctttttattc cacttaattc tttagtgaag ctaagattgc  
48421 tcttatcccc caaagtgggc caagagggga tcaatggctt gtgtgagtcc cagaggtcta  
48481 agtggggaga tgaatctgac ccacgcagcc tgactccata gcacatgcca ctaatcatca  
48541 ccctacaata gtcaacaatg ctgatgggat gaggtacagt gtgattgaaa ctccatcaaa  
48601 aaccacgaaa ataggcagaa gcaaaaaggc tggagagatg gttcaggggt taaggcaagt  
48661 gctggcaagc ctgcctatcc aagtttgatc cctgagagcc acacagtaga aagtaaactg  
48721 acttcctcac cgggtcctct gggctctgta caccgggca tatgtatata tgcataatctt  
48781 cataaagtac atgaataatt ataataaaat tttaaattaa gtagaaaacc tcttctagta  
48841 atagaactat ggctaataatt tacccttttt aaatatttta ccacaagctg tactacttgc  
48901 ataatcagga aaaaaaaaaag aaatgttgaa atgttcagct ctaatatcat gggctagcta  
48961 gcatactcct acacacatga aattcgttcg cagtgcctct tttccctgag agaagagtga  
49021 actatthttct atacgttgag gaaaaaacgg ttgtgtgagt cttcatcct gagctgagct  
49081 ccactatcca tccctaacct cctatctggt acttgtggag tgactggatg ggccaattcc  
49141 cctagaatct agattcagtc tacatatttc ccgaatacaa gattcatgat tgacactatg  
49201 ataagagctt ccatgatgct cccctccttg tgacacatcc tggactttat agtatattct  
49261 ctactcaaag ctgaggaaat caagtctggt gaagcaacaa ctgacaaaga tcacacatca  
49321 atcagtggct gttacttttc ctgaggccct aatcttactt caattggggg gttgaaataa  
49381 actatataat accttcgttc cattcttctt catgtttaca tatgtaaatg gcaactcggg  
49441 acacagcaaa taagtggcca cgttggaaat ggaaataggg attctgtatt ccagatcttg  
49501 cttccttagt gttcgtgttt ggatcttttt actcagcaac taaaatcctc aatcaccag  
49561 gacataacag ccctggctca cagaccagca tccgtgcctt tgaggaagaa aatgttaagg  
49621 ataaaggaga atggtacaac ttctgtctac tggggttcct gcagaaggty gaggctttaa  
49681 gtagcgattc aaagctgagg ttcacctcca atcttgttct ccagctctaa cctccaatct  
49741 gaagctcagg actgcctgcc ctagggtttg ttaaccata ataagcttgc taccacttaa  
49801 agagctaata tagccagatt catcccttag attctcagga caaggagttt cccaaaagcc  
49861 aagtactgat tccctgactg tgctgataat cagtatctat ttttaagtcc ctatthttct  
49921 gtataatatt cataattatt ccagcacagc actaaagaca taagactgtc acttctatga  
49981 ttcactgaaa tacatgtagc ccccgacttg acagccactt caagaaaaaa atctaatac  
50041 cctagttatg tctagtttta ttgtgcttct tctaactata cattaatgac gtttacttaa  
50101 attctggaca agcttacatg taatcatttg tttagataac ctttagggca tgatccttta  
50161 atgtthttaa aagtttaggt caaacattt ttatthttgt attactaagt aaaattagga  
50221 aataatacag aatttgaatt agaacttagc agtatcacag aaactaaaga aacaaagaaa  
50281 taaaaatgaa tgaatcacta gcaaacactt tctaaaagct aaagtcttc taataatgcy  
50341 gcaaaataca aattatthtc ttatctgcct tctagacgct agtcaaagaa agtcaggat  
50401 actcagtgga aaactgtcag aaaaaaaca agtcctattt gtgtaacttg ggtggagtaa  
50461 ggctagatcc tggggggttt ggagcgggga gctctgctgc gtggataaga cttaccagca  
50521 atagcaccgg ctaagagcag gcttccgggg ctgacctgcc cgtcttcatt tgcaaggaa  
50581 gccttcacgt gggcatagca cgggaagtag atggctgaga aaggaatgtc cctcaggaag  
50641 catgctttgg cgccctgtgg ggtttgcaag gagaagaaaa accacatgaa gcacacatcc  
50701 cacggagaag gtcaggcttc tctggaactt acctcagaac gaaatattcc tggagaagac  
50761 caaatttgta ctcacacact gaggggggtg ggtggggaca gcaaatata acccgagttc  
50821 tcaaagcagc aagatgcagg cttgatcttc caaacacaac tagctttgtc atagggggtg  
50881 aagacatgag aaaaggaagt tcccggctac tctaaagctg agctgtcaac tcaacaatt  
50941 ttggaaccct gtctgtgacg cttttcaagt ctcaatgggt ggaagtcacc ggcatttcaa  
51001 g

/
